# Supplementary material for: Enantiopure cycloalkane fused tetrahydropyrans through domino Michael–ketalizations with organocatalysis
Source: Royal Society of Chemistry journal article supplement (doi:10.1039/b904662c), 2009-01-01
Supplement: b904662c_2.pdf [file b904662c_2.pdf]

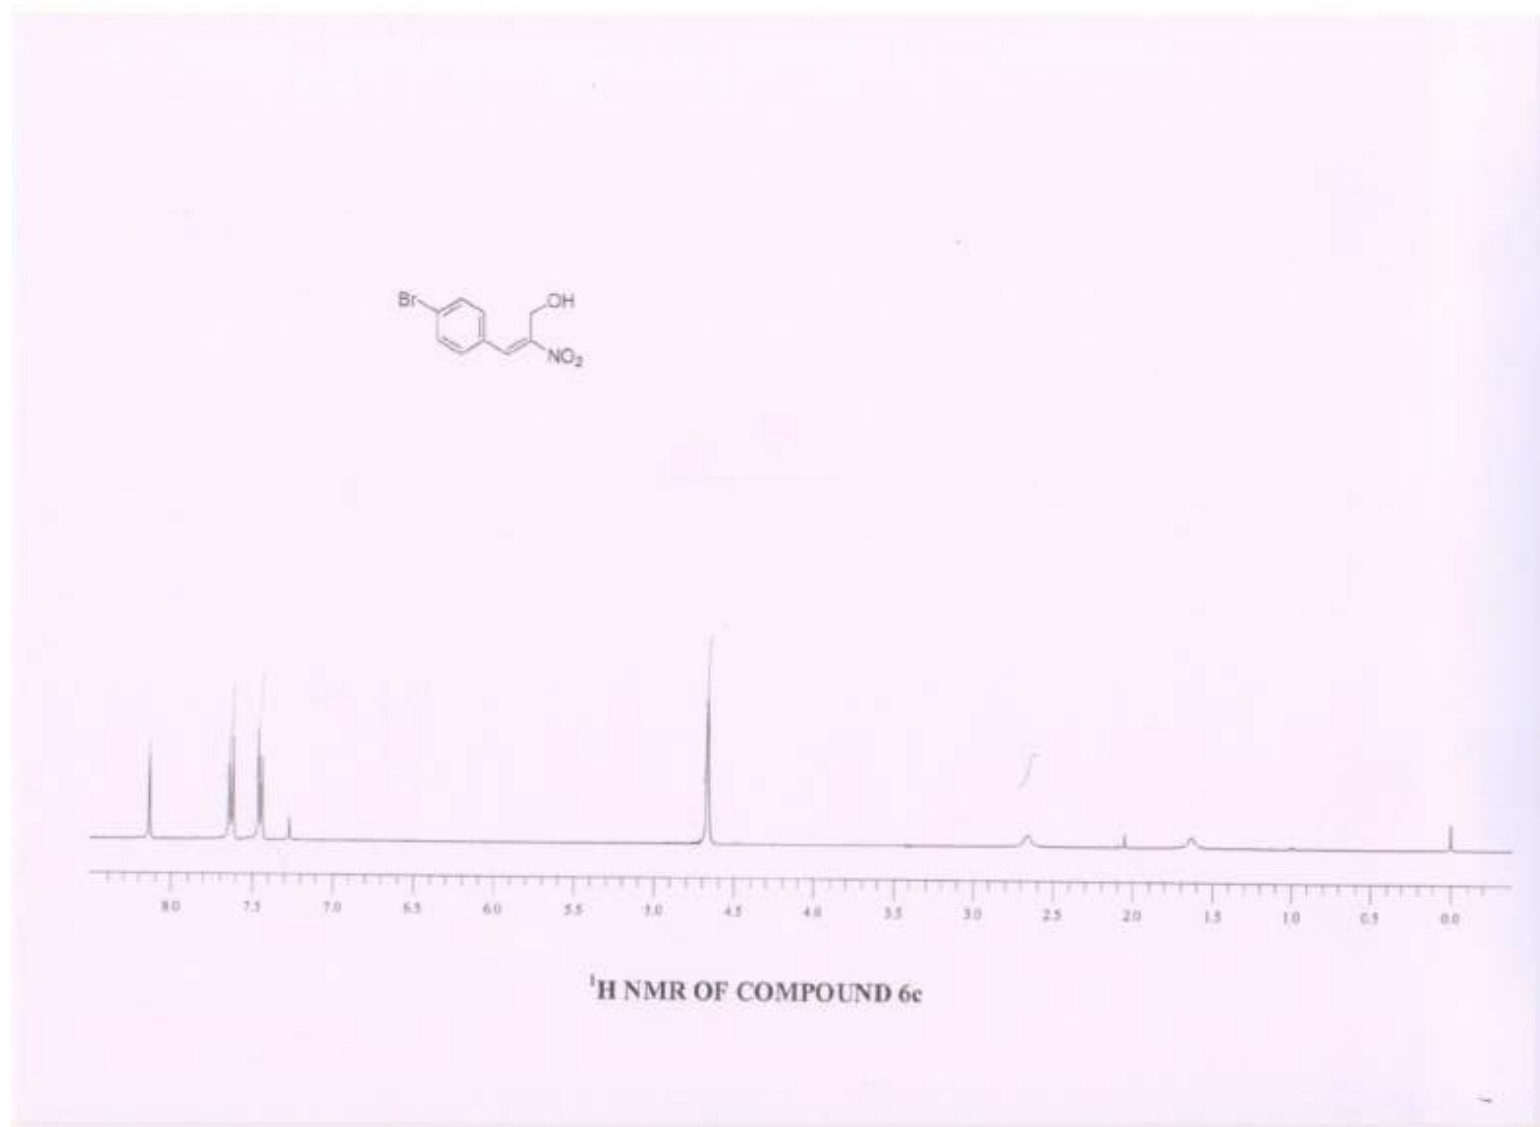

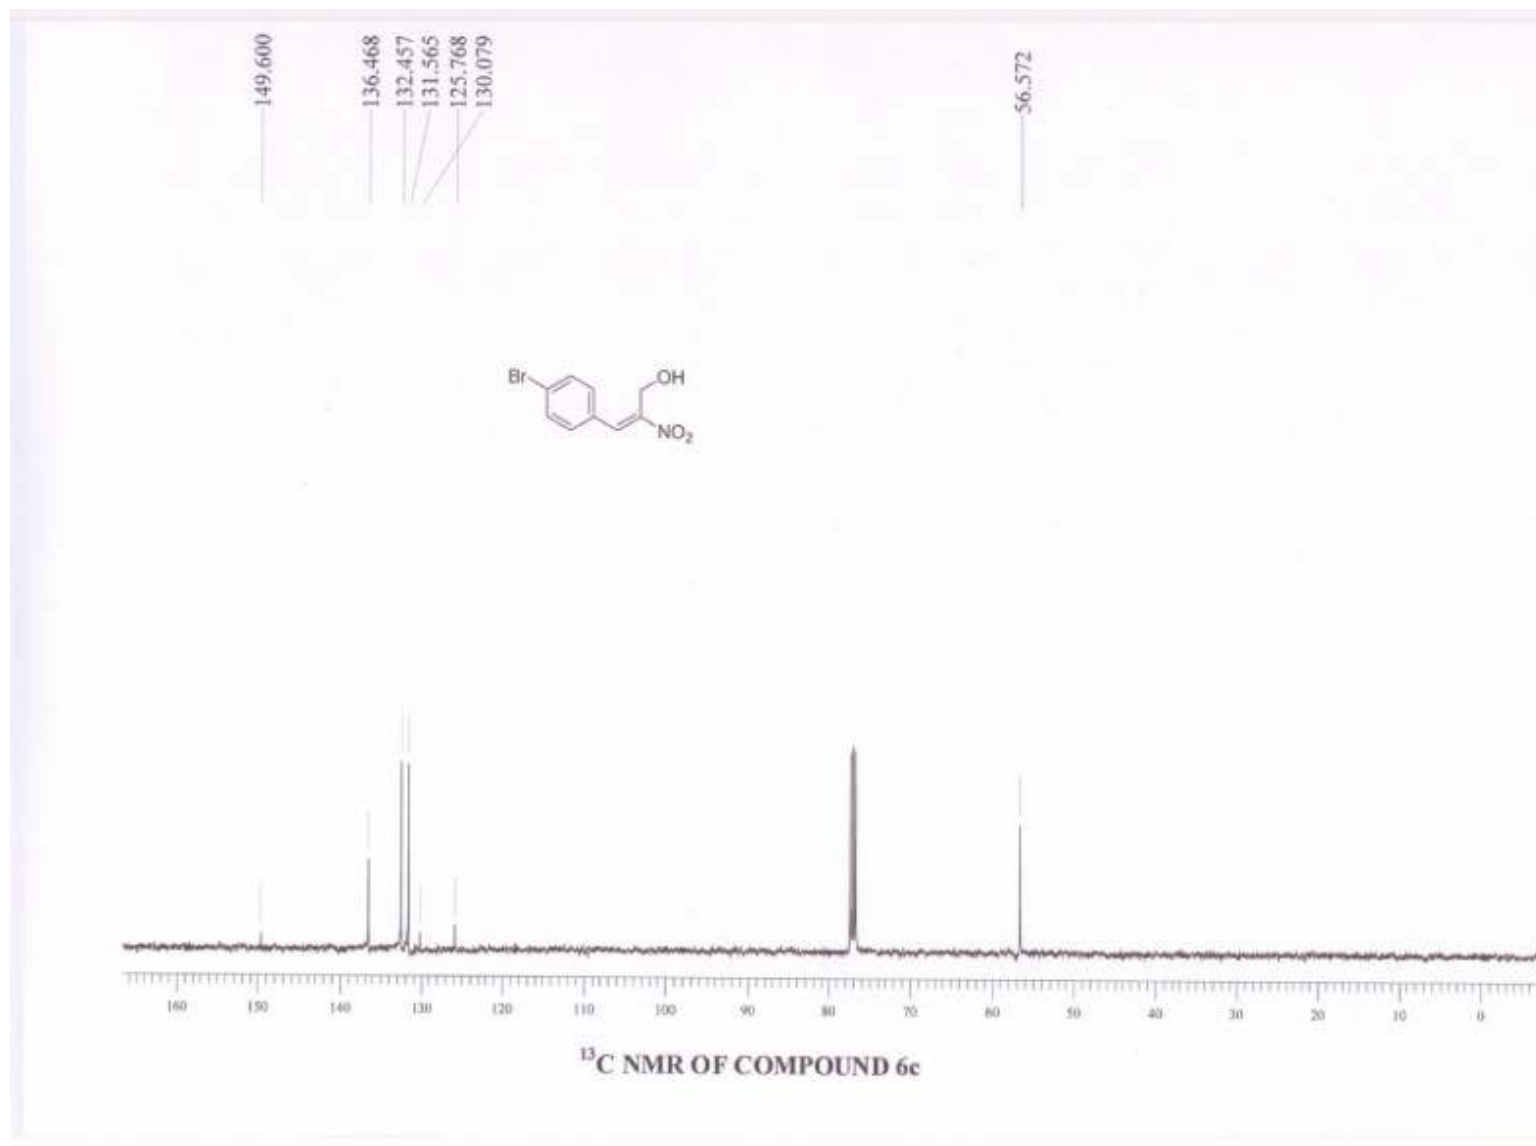

Enantiopure cycloalkane fused tetrahydro pyrans through domino Michael–ketalizations with organocatalysis

Srivari Chandrasekhar, Kundarapu Mallikarjun, Gangireddy Pavankumarreddy, Veera Mohan and Bharatam Jagadeesh

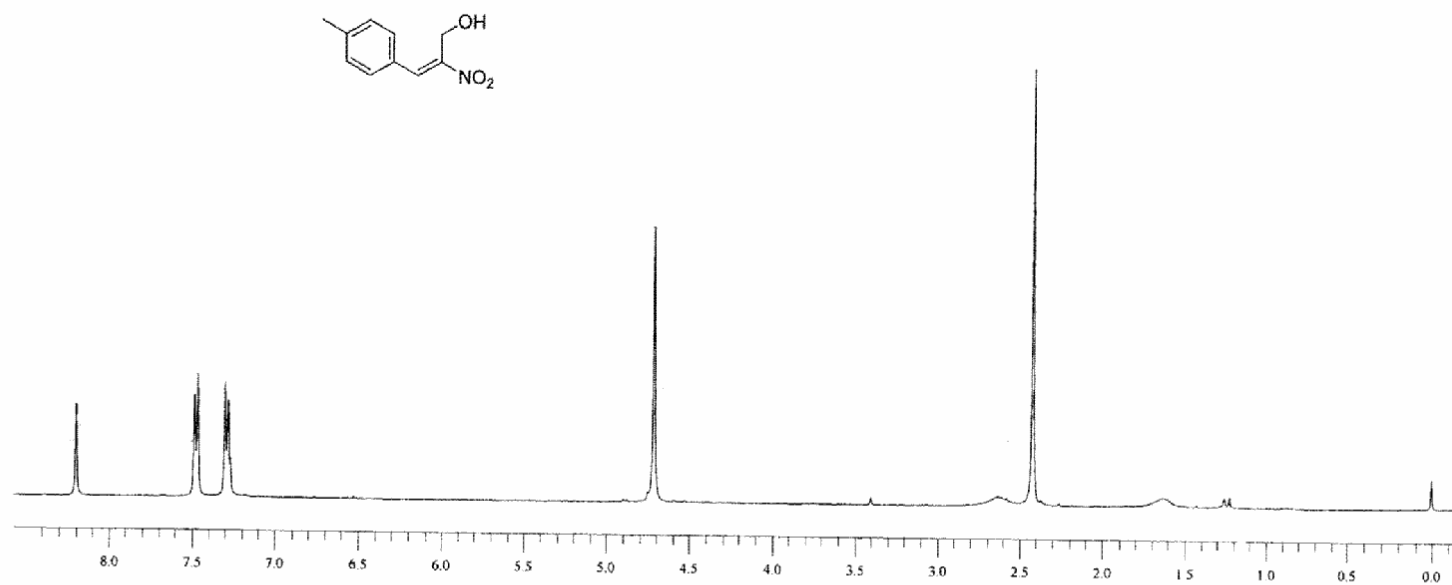

**<sup>1</sup>H NMR OF COMPOUND 6d**

Enantiopure cycloalkane fused tetrahydro pyrans through domino Michael–ketalizations with organocatalysis

Srivari Chandrasekhar, Kundarapu Mallikarjun, Gangireddy Pavankumarreddy, Veera Mohan and Bharatam Jagadeesh

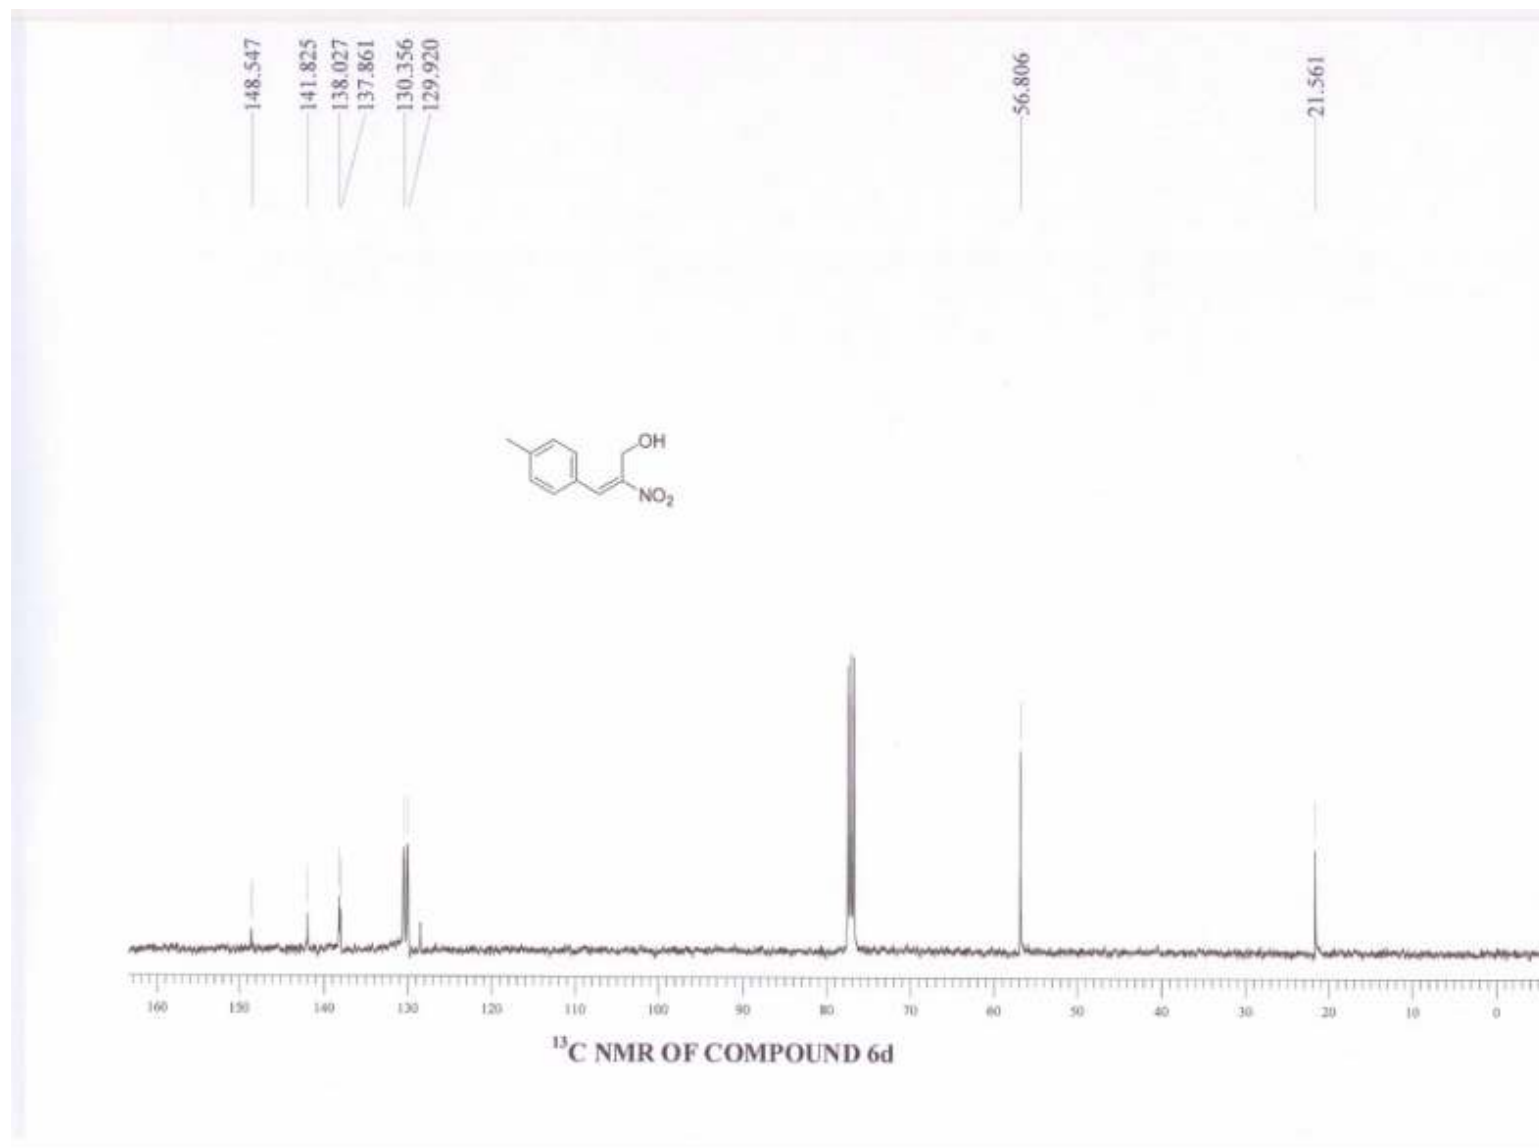

Enantiopure cycloalkane fused tetrahydro pyrans through domino Michael–ketalizations with organocatalysis

Srivari Chandrasekhar, Kundarapu Mallikarjun, Gangireddy Pavankumarreddy, Veera Mohan and Bharatam Jagadeesh

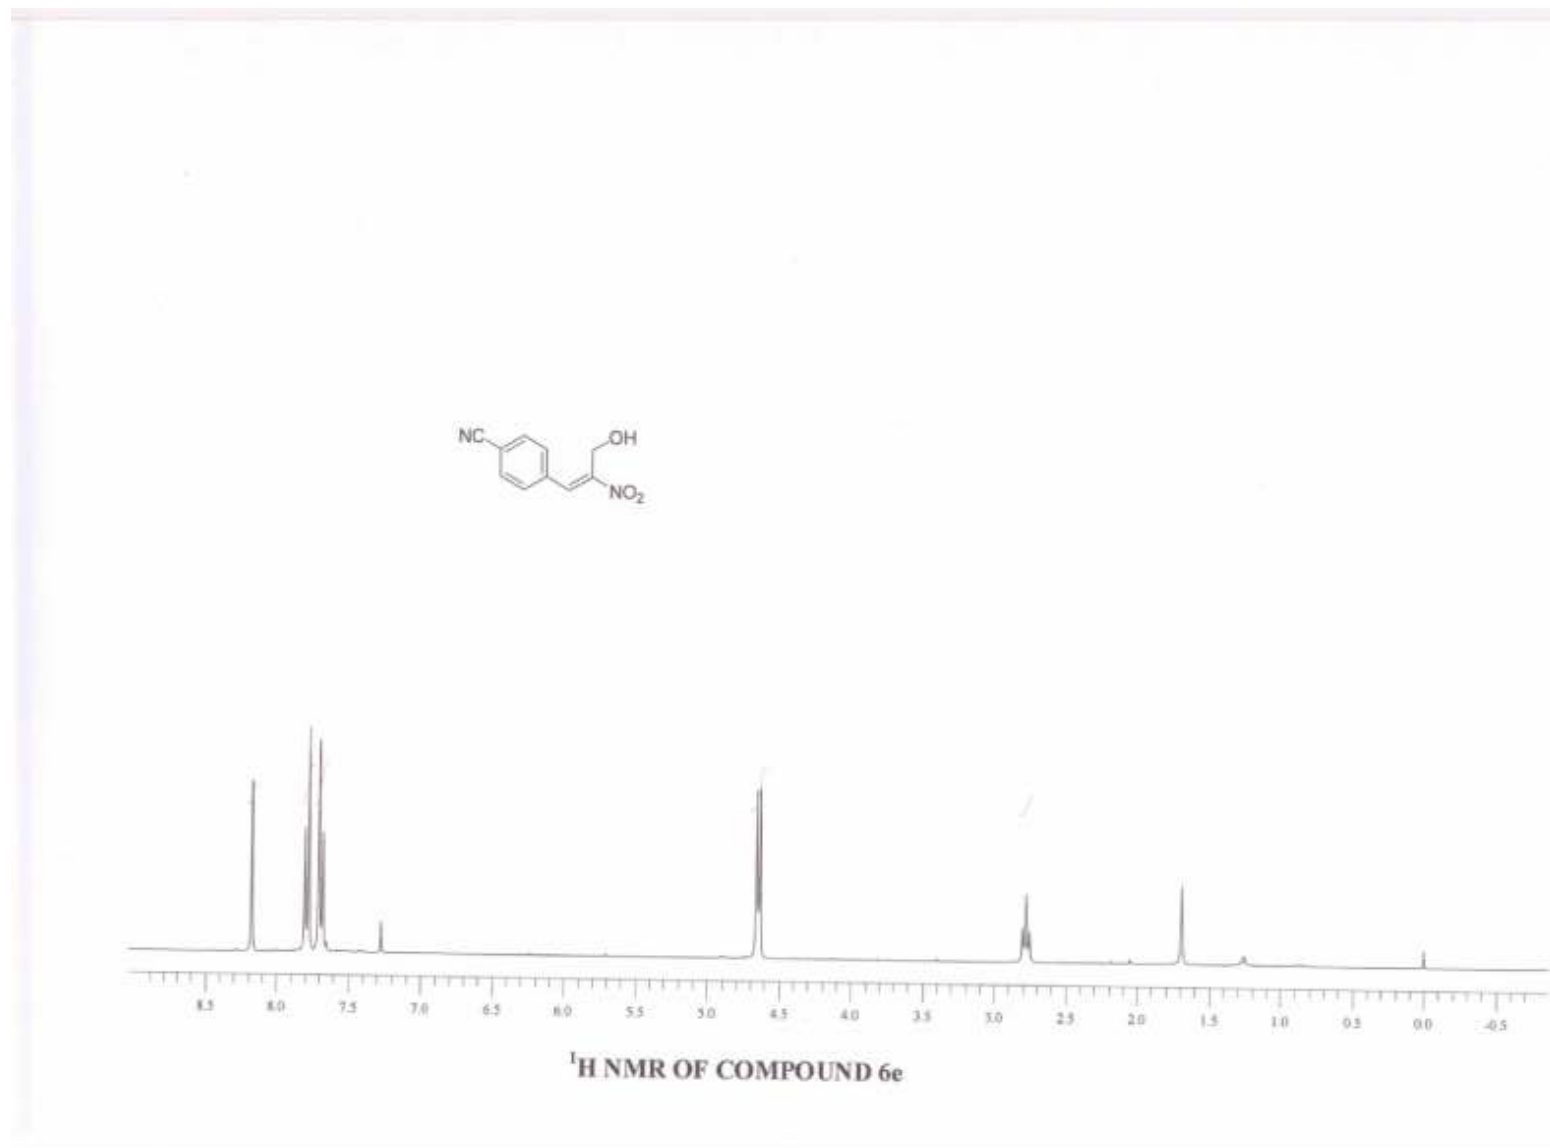

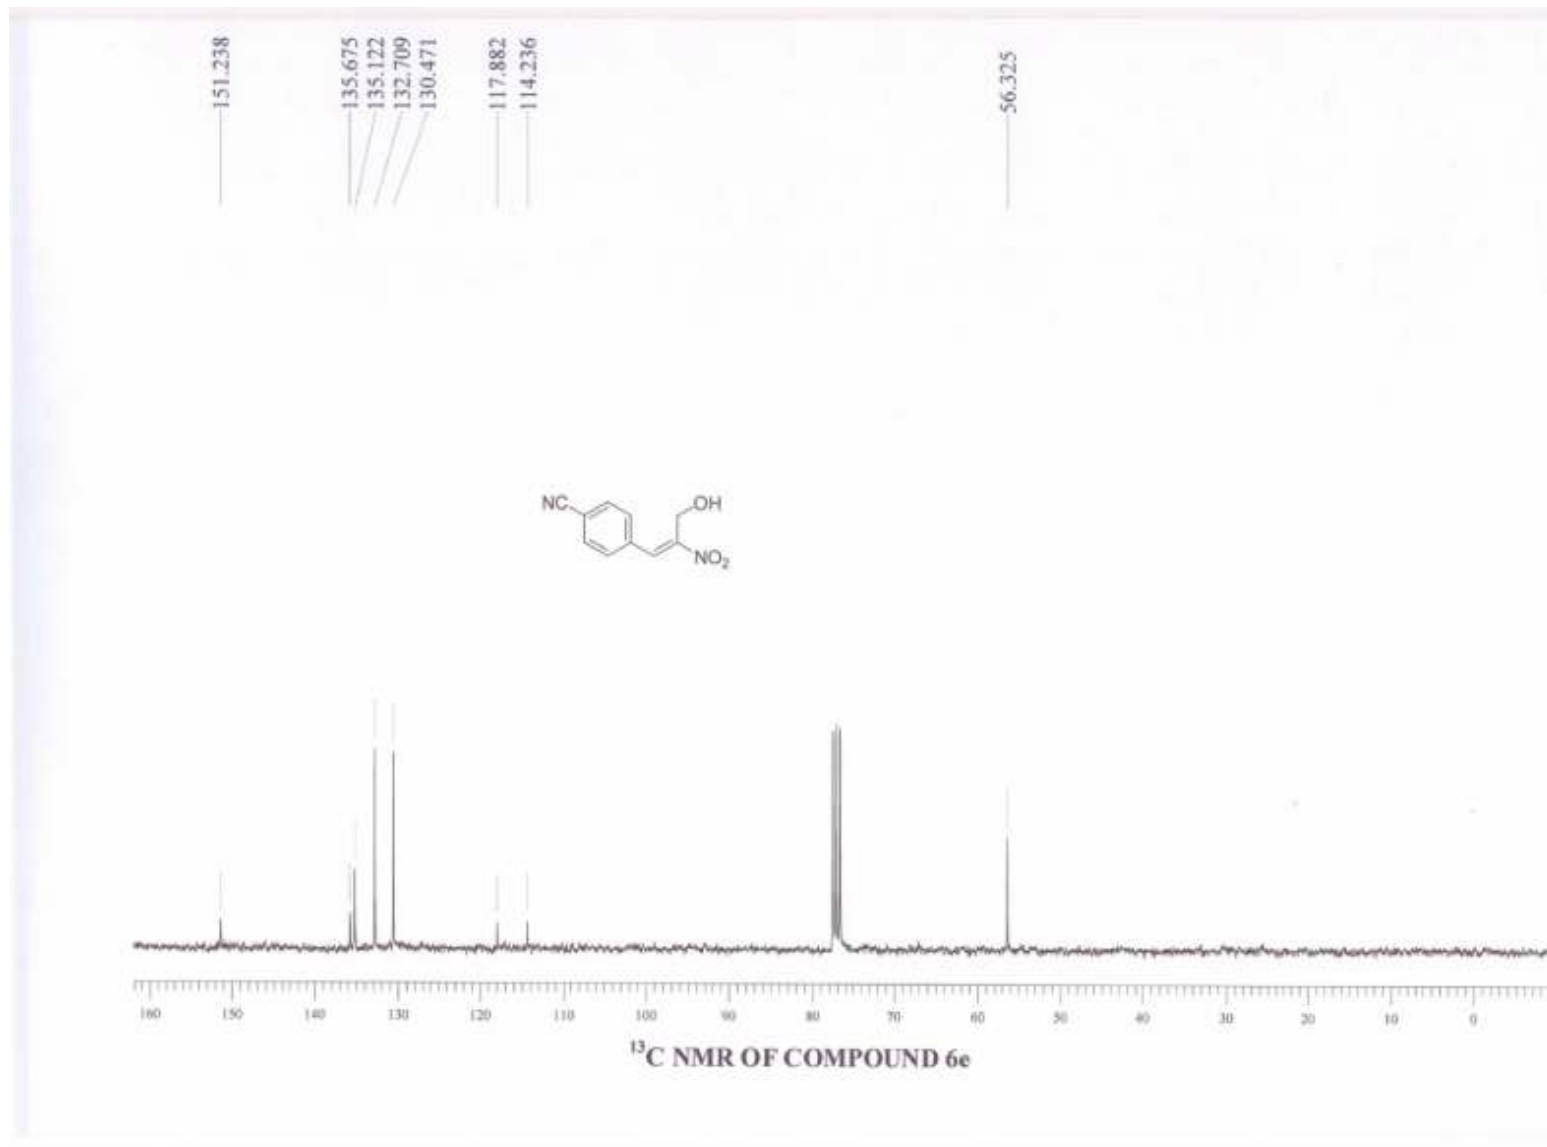

Enantiopure cycloalkane fused tetrahydro pyrans through domino Michael–ketalizations with organocatalysis

Srivari Chandrasekhar, Kundarapu Mallikarjun, Gangireddy Pavankumarreddy, Veera Mohan and Bharatam Jagadeesh

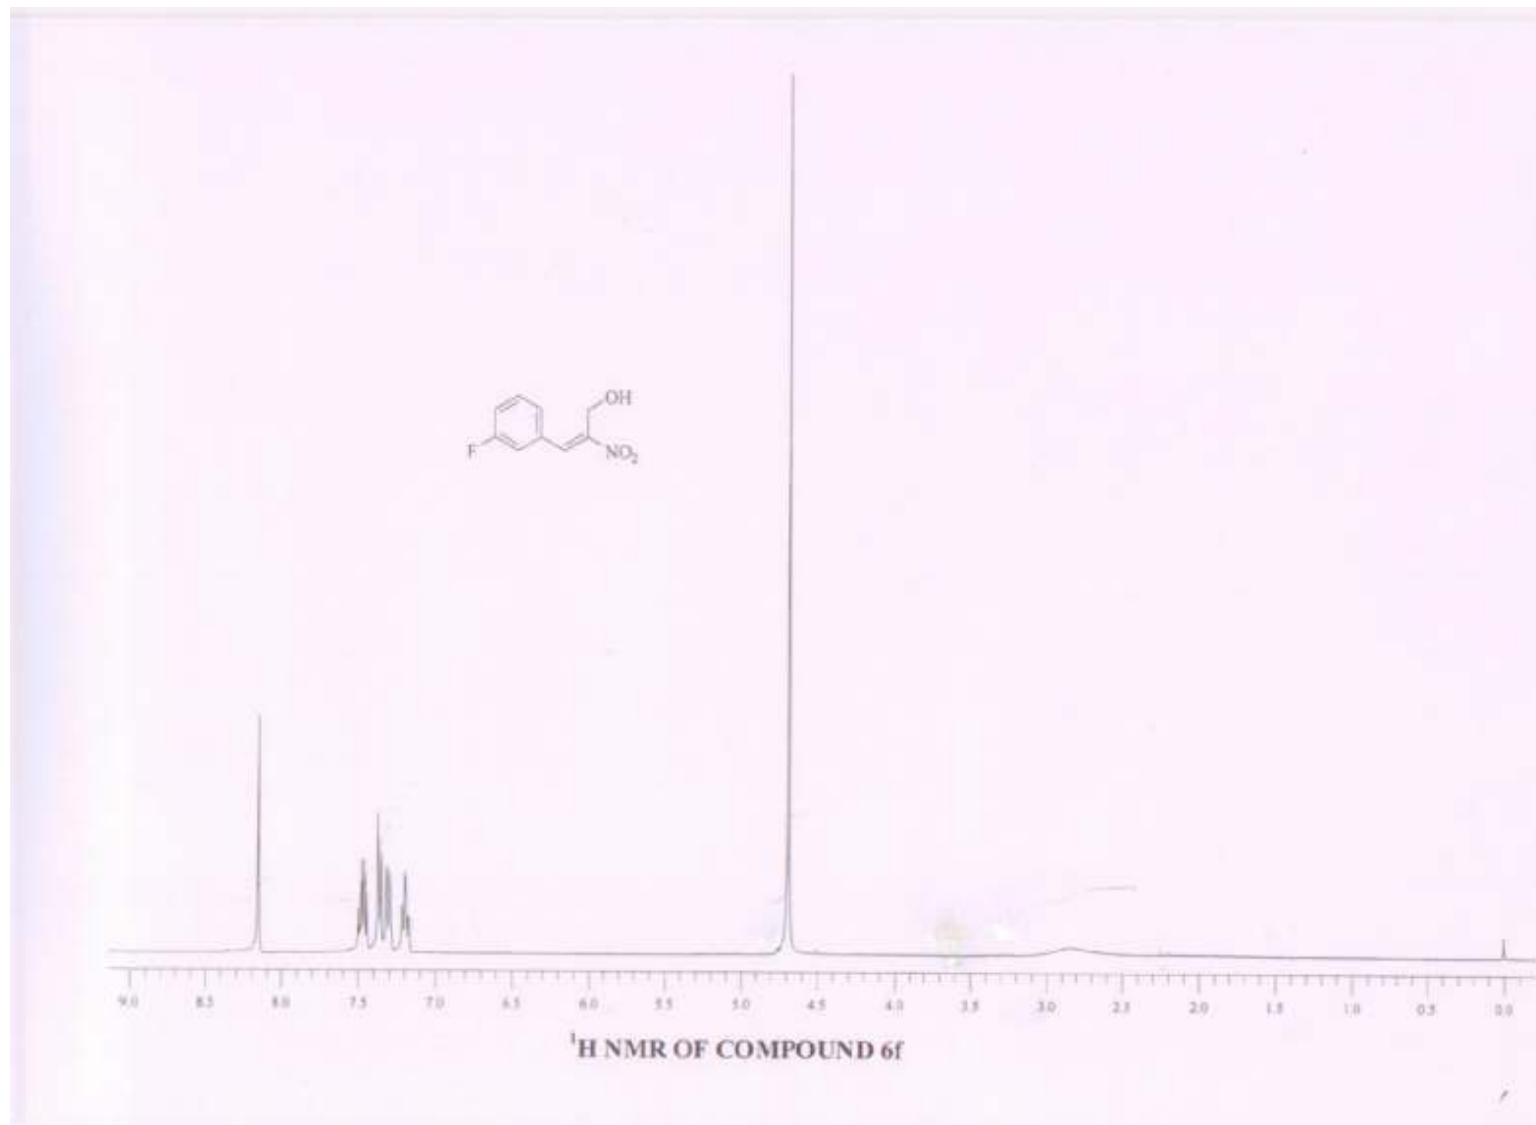

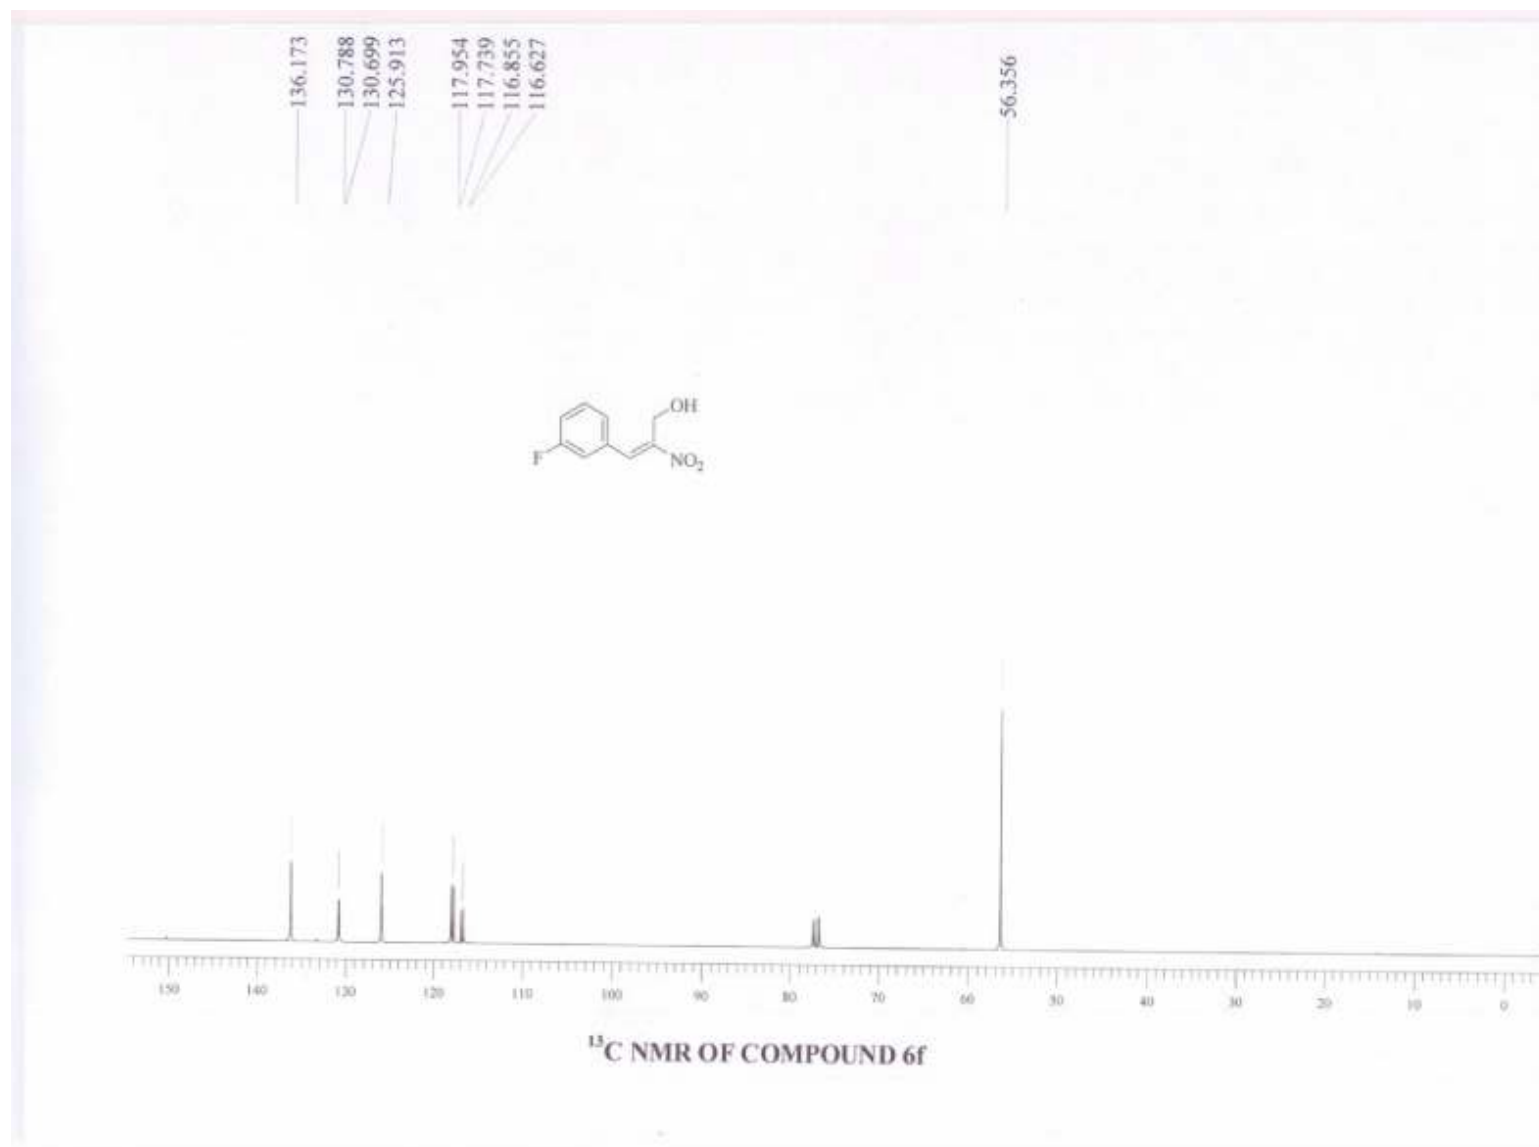

Enantiopure cycloalkane fused tetrahydro pyrans through domino Michael–ketalizations with organocatalysis

Srivari Chandrasekhar, Kundarapu Mallikarjun, Gangireddy Pavankumarreddy, Veera Mohan and Bharatam Jagadeesh



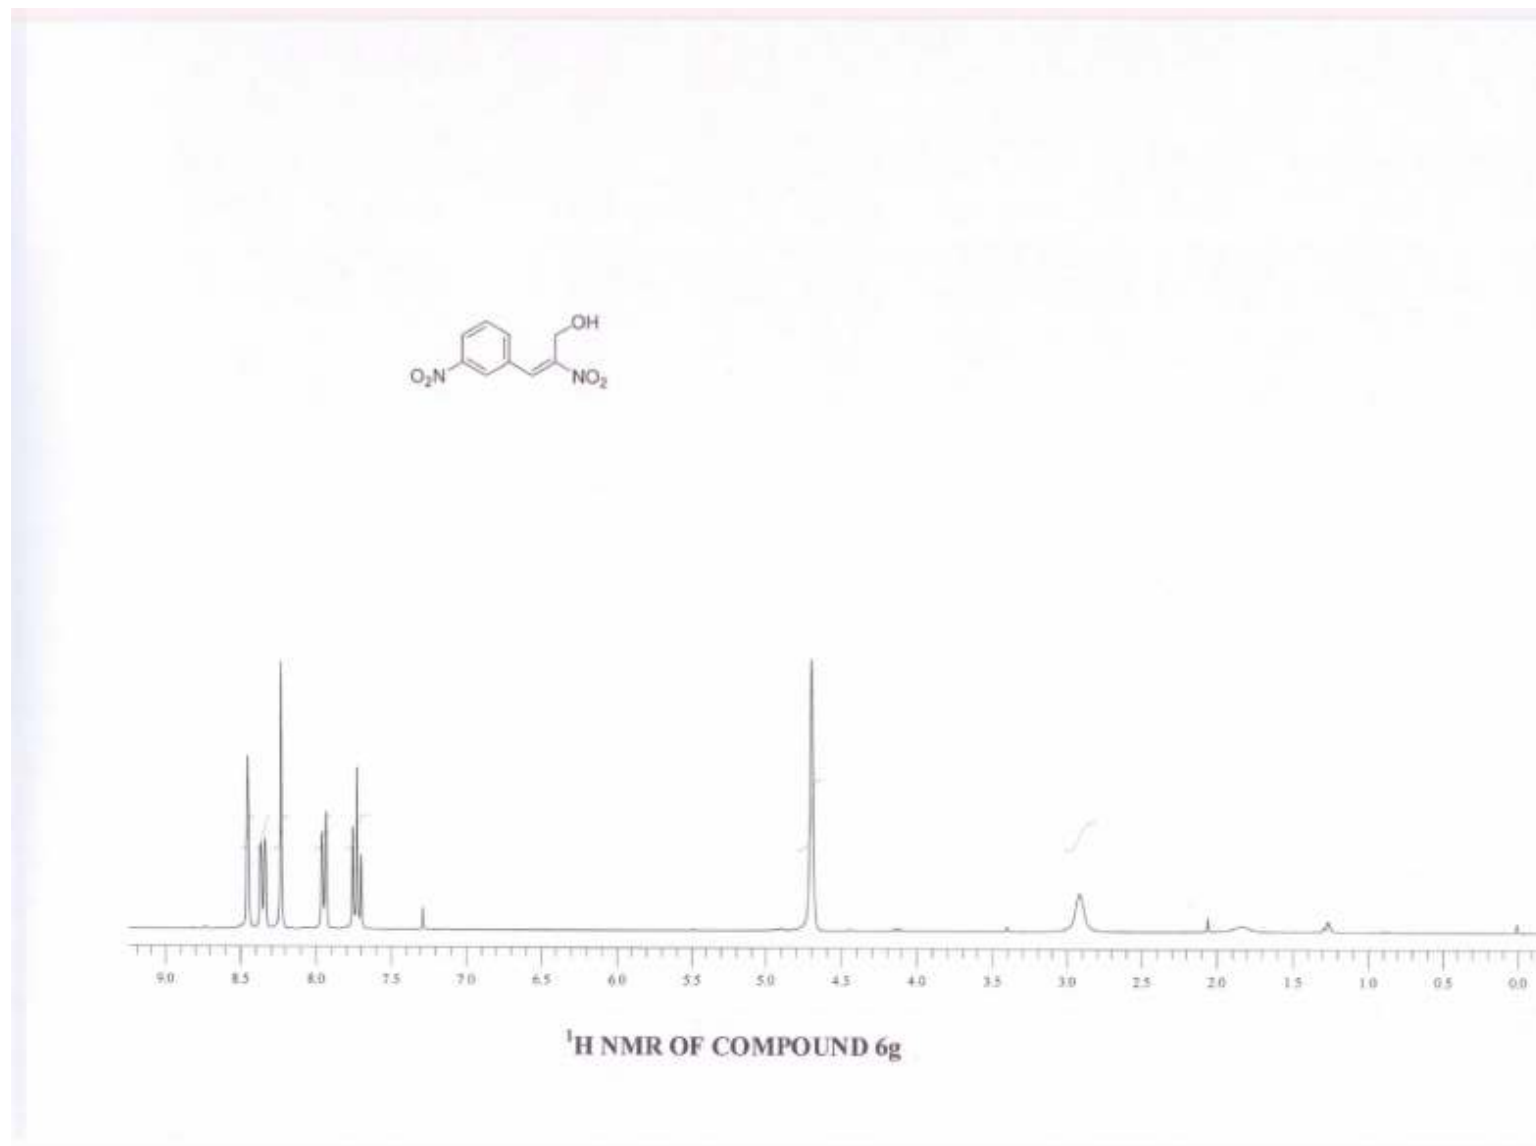

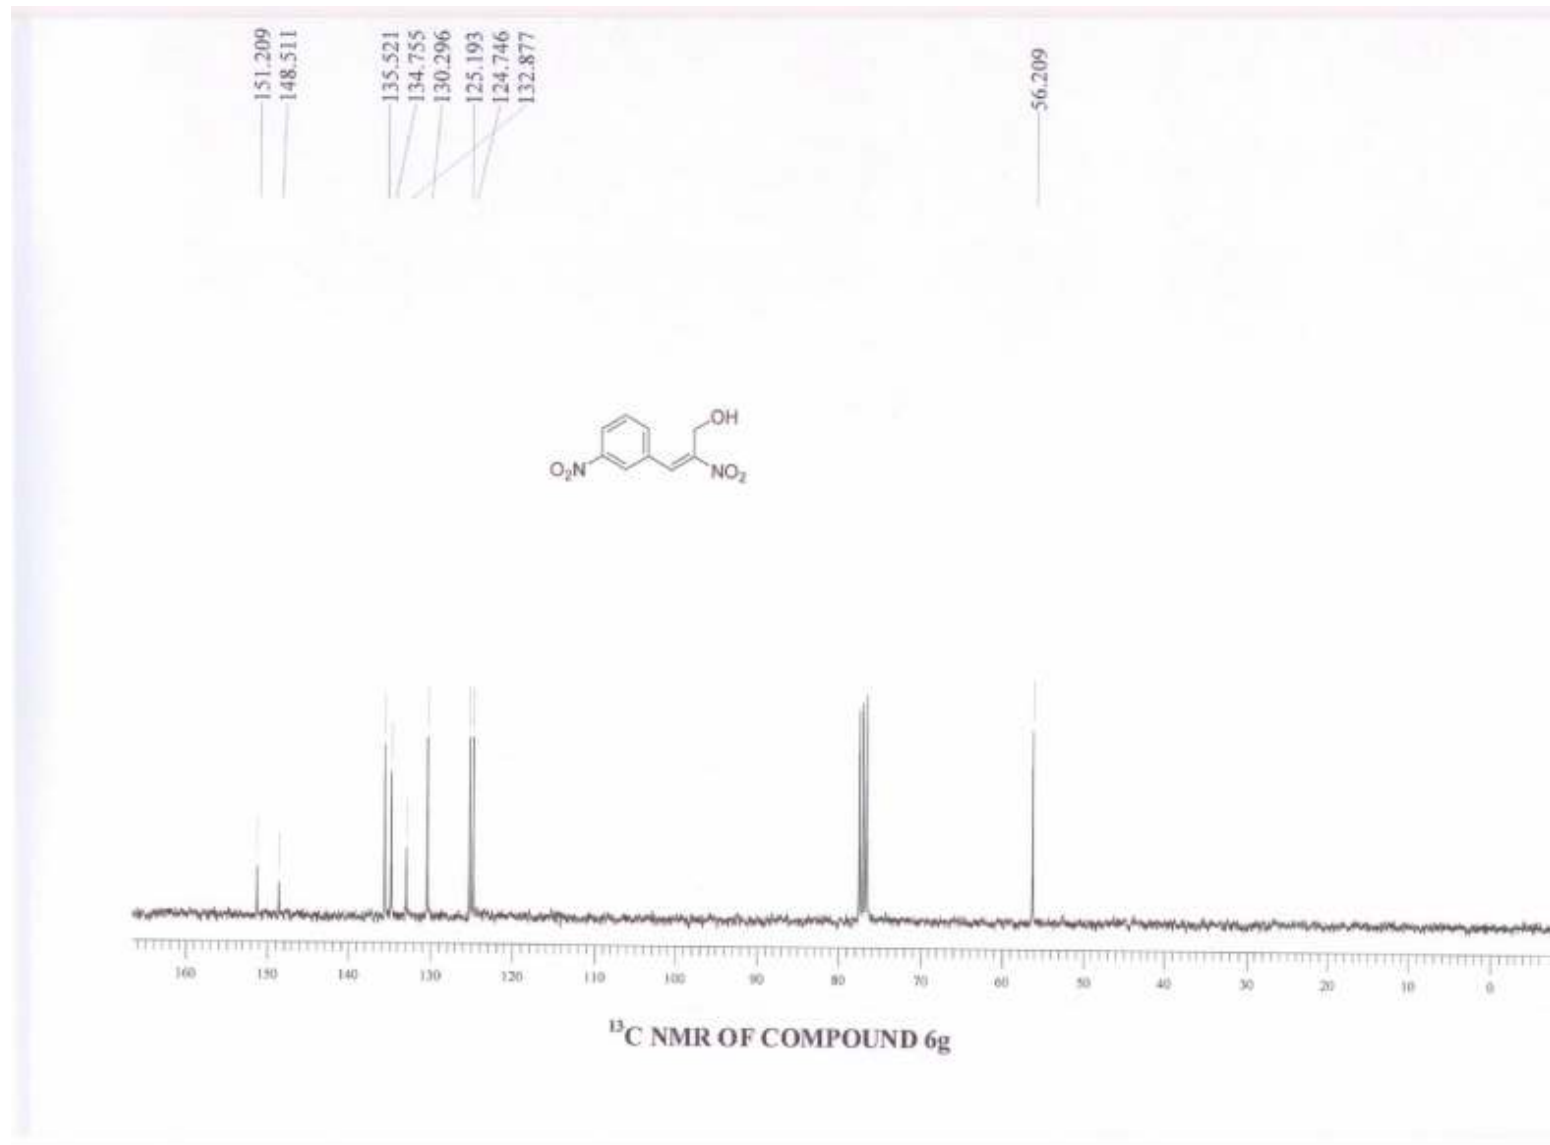

Enantiopure cycloalkane fused tetrahydro pyrans through domino Michael–ketalizations with organocatalysis

Srivari Chandrasekhar, Kundarapu Mallikarjun, Gangireddy Pavankumarreddy, Veera Mohan and Bharatam Jagadeesh

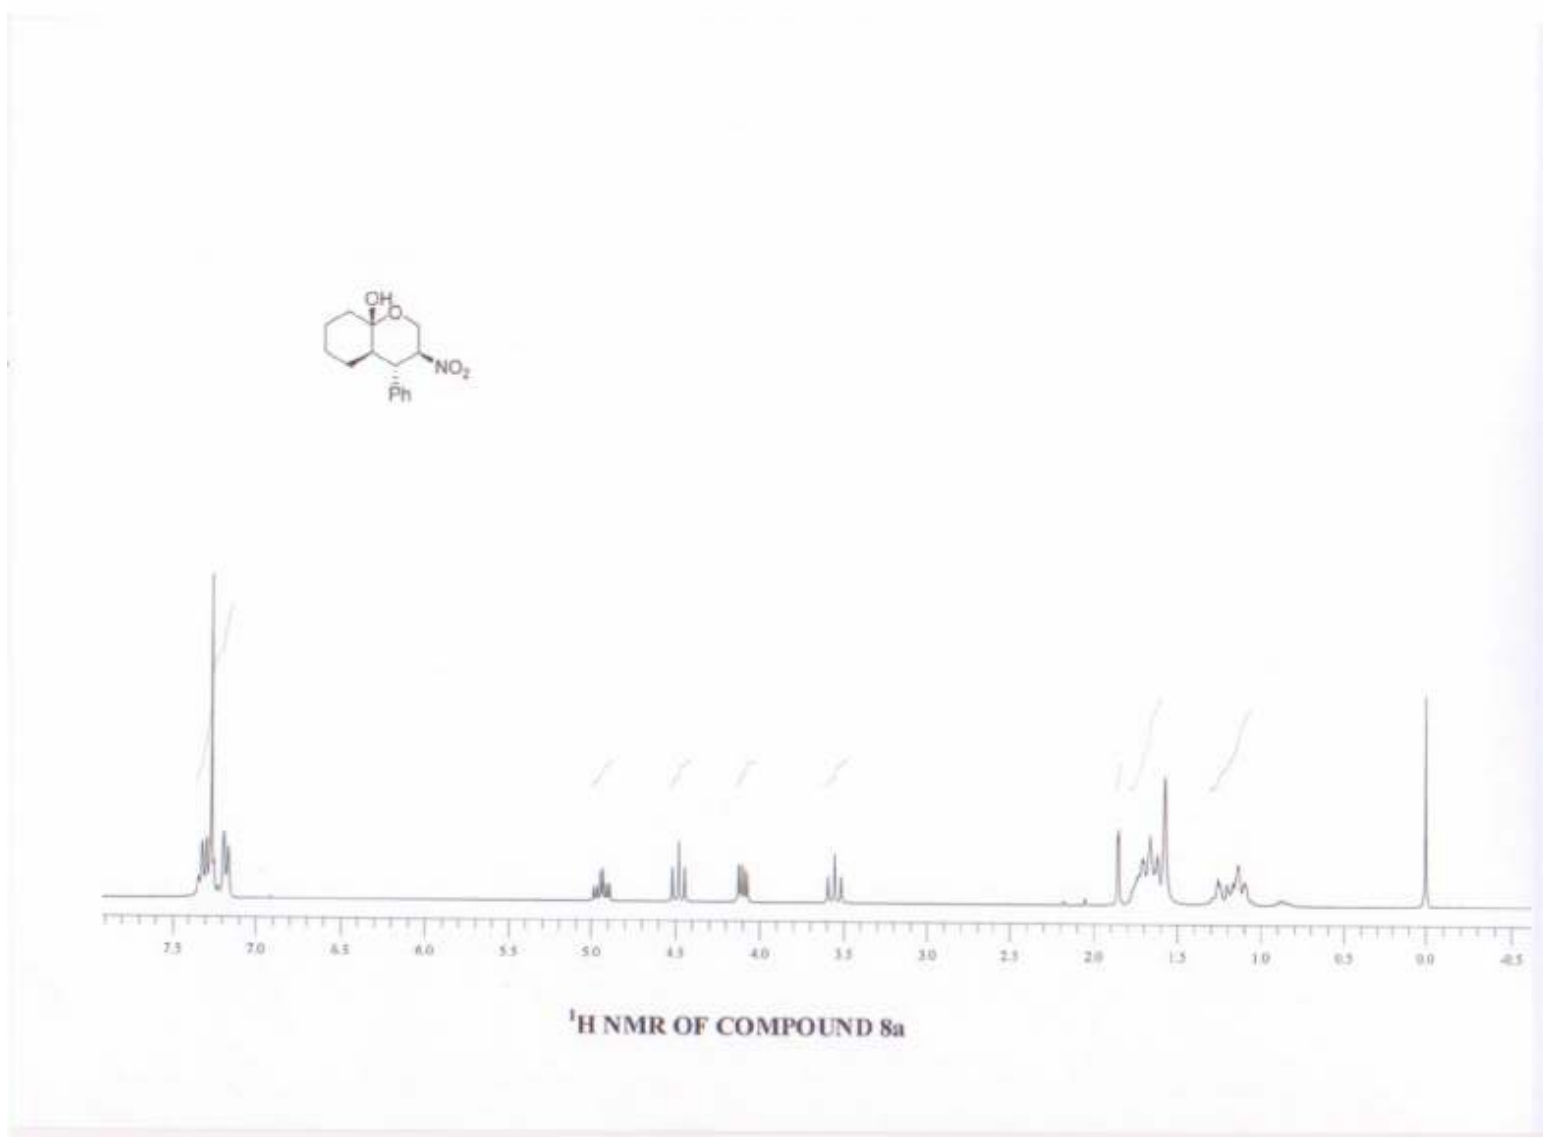

Enantiopure cycloalkane fused tetrahydro pyrans through domino Michael–ketalizations with organocatalysis

Srivari Chandrasekhar, Kundarapu Mallikarjun, Gangireddy Pavankumarreddy, Veera Mohan and Bharatam Jagadeesh

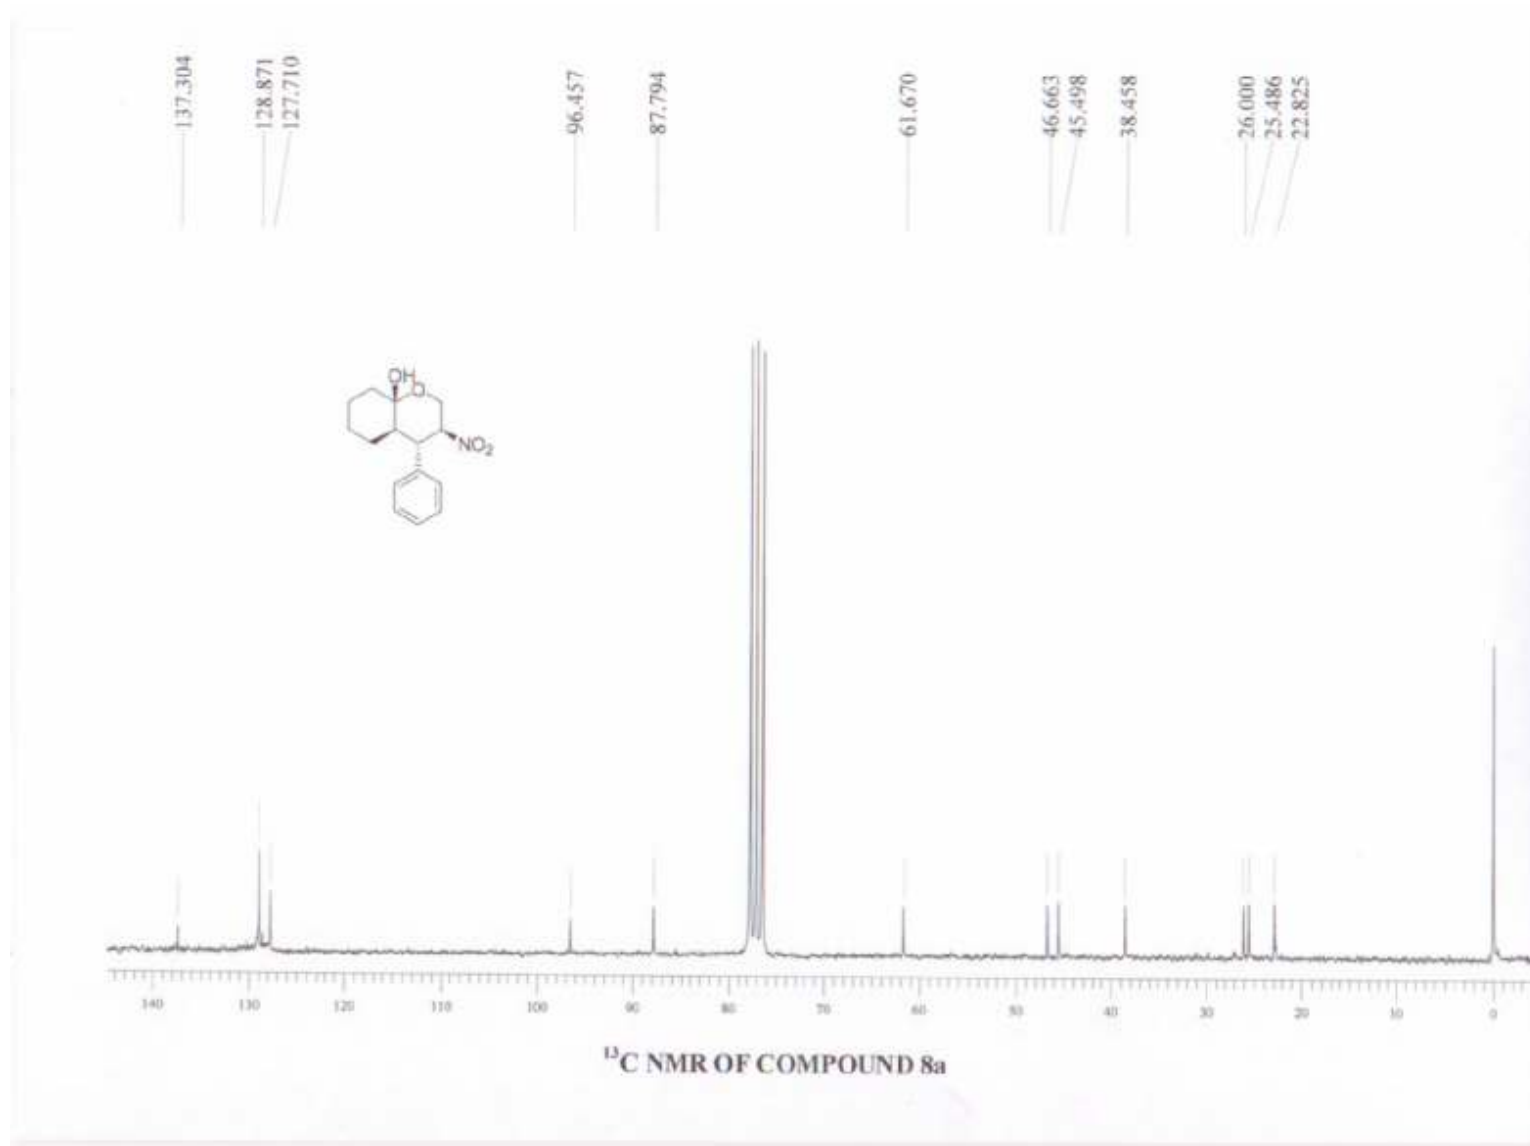

Enantiopure cycloalkane fused tetrahydro pyrans through domino Michael–ketalizations with organocatalysis

Srivari Chandrasekhar, Kundarapu Mallikarjun, Gangireddy Pavankumarreddy, Veera Mohan and Bharatam Jagadeesh

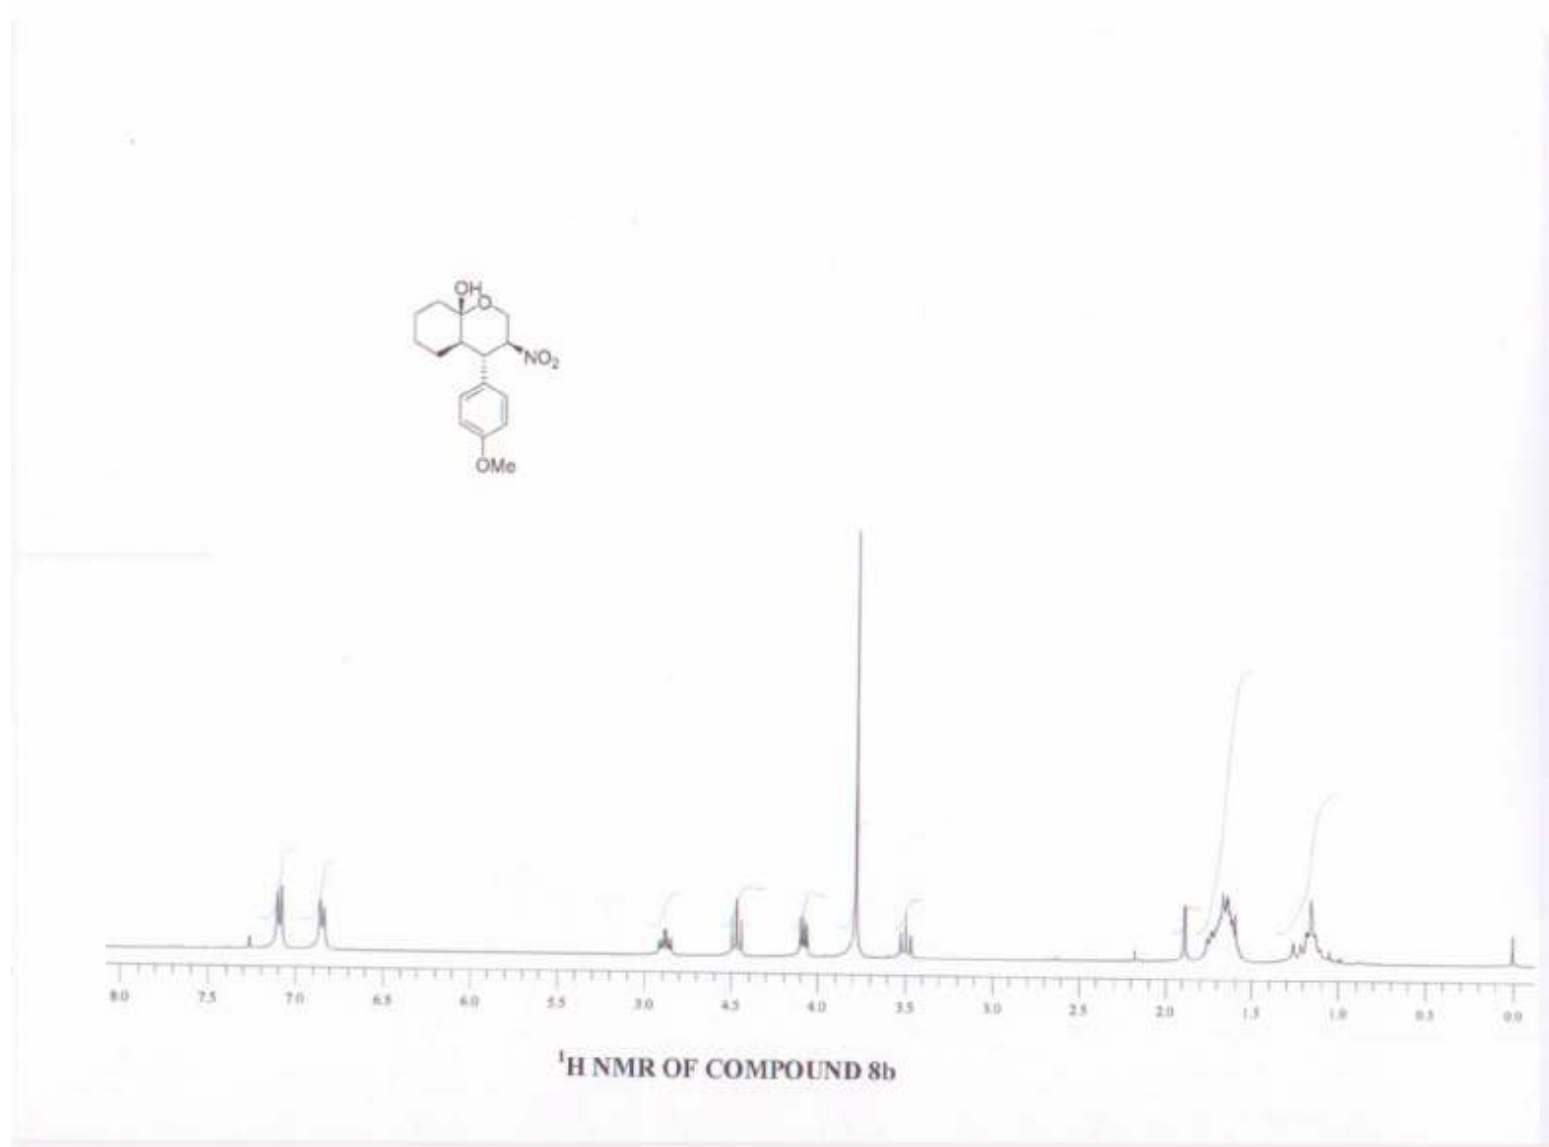

Enantiopure cycloalkane fused tetrahydro pyrans through domino Michael–ketalizations with organocatalysis

Srivari Chandrasekhar, Kundarapu Mallikarjun, Gangireddy Pavankumarreddy, Veera Mohan and Bharatam Jagadeesh

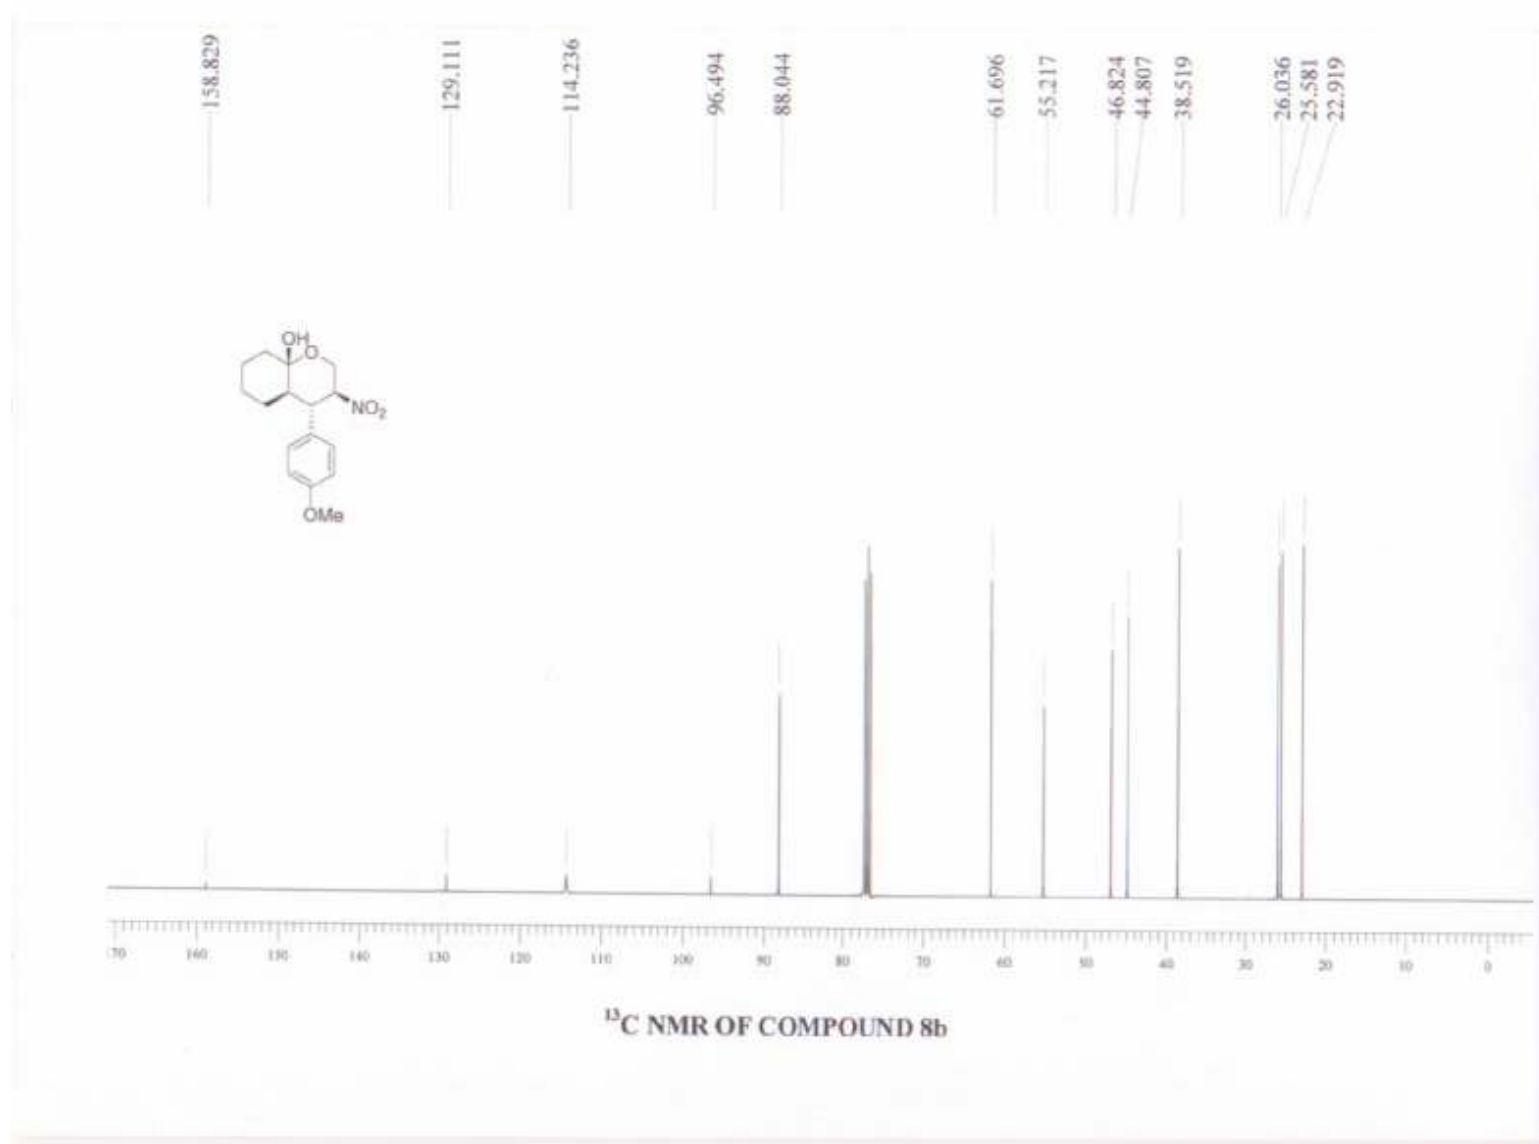

Enantiopure cycloalkane fused tetrahydro pyrans through domino Michael–ketalizations with organocatalysis

Srivari Chandrasekhar, Kundarapu Mallikarjun, Gangireddy Pavankumarreddy, Veera Mohan and Bharatam Jagadeesh

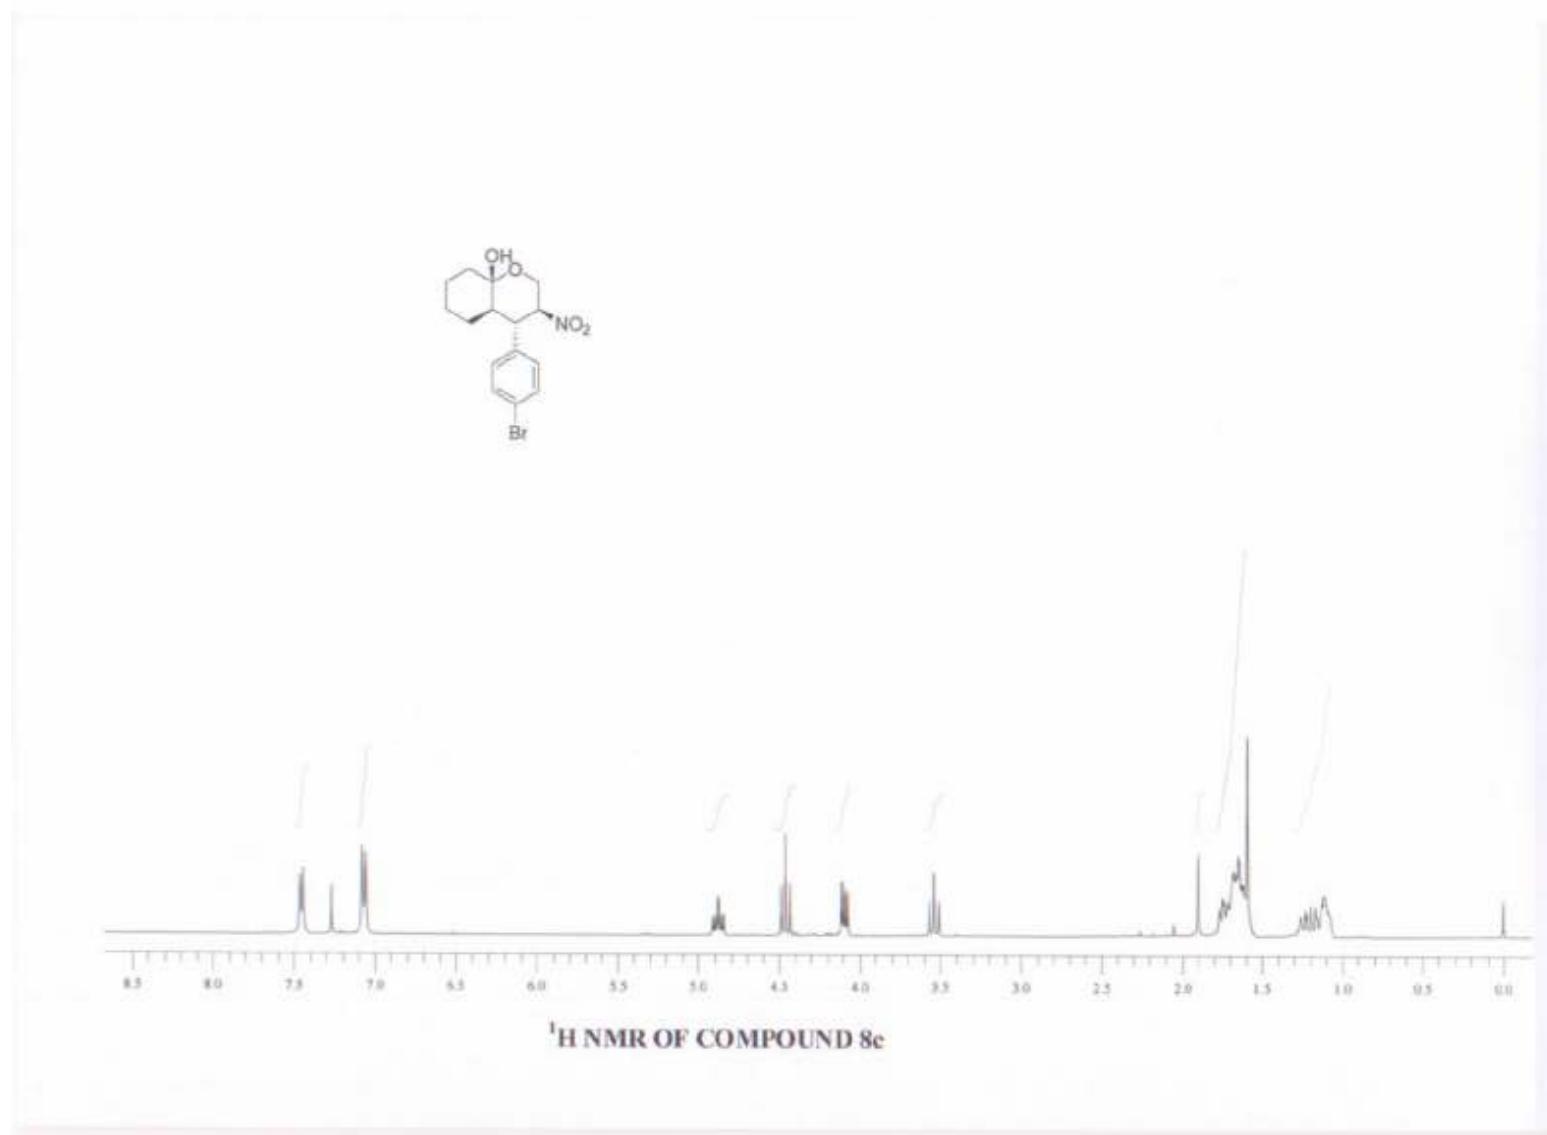

Enantiopure cycloalkane fused tetrahydro pyrans through domino Michael–ketalizations with organocatalysis

Srivari Chandrasekhar, Kundarapu Mallikarjun, Gangireddy Pavankumarreddy, Veera Mohan and Bharatam Jagadeesh

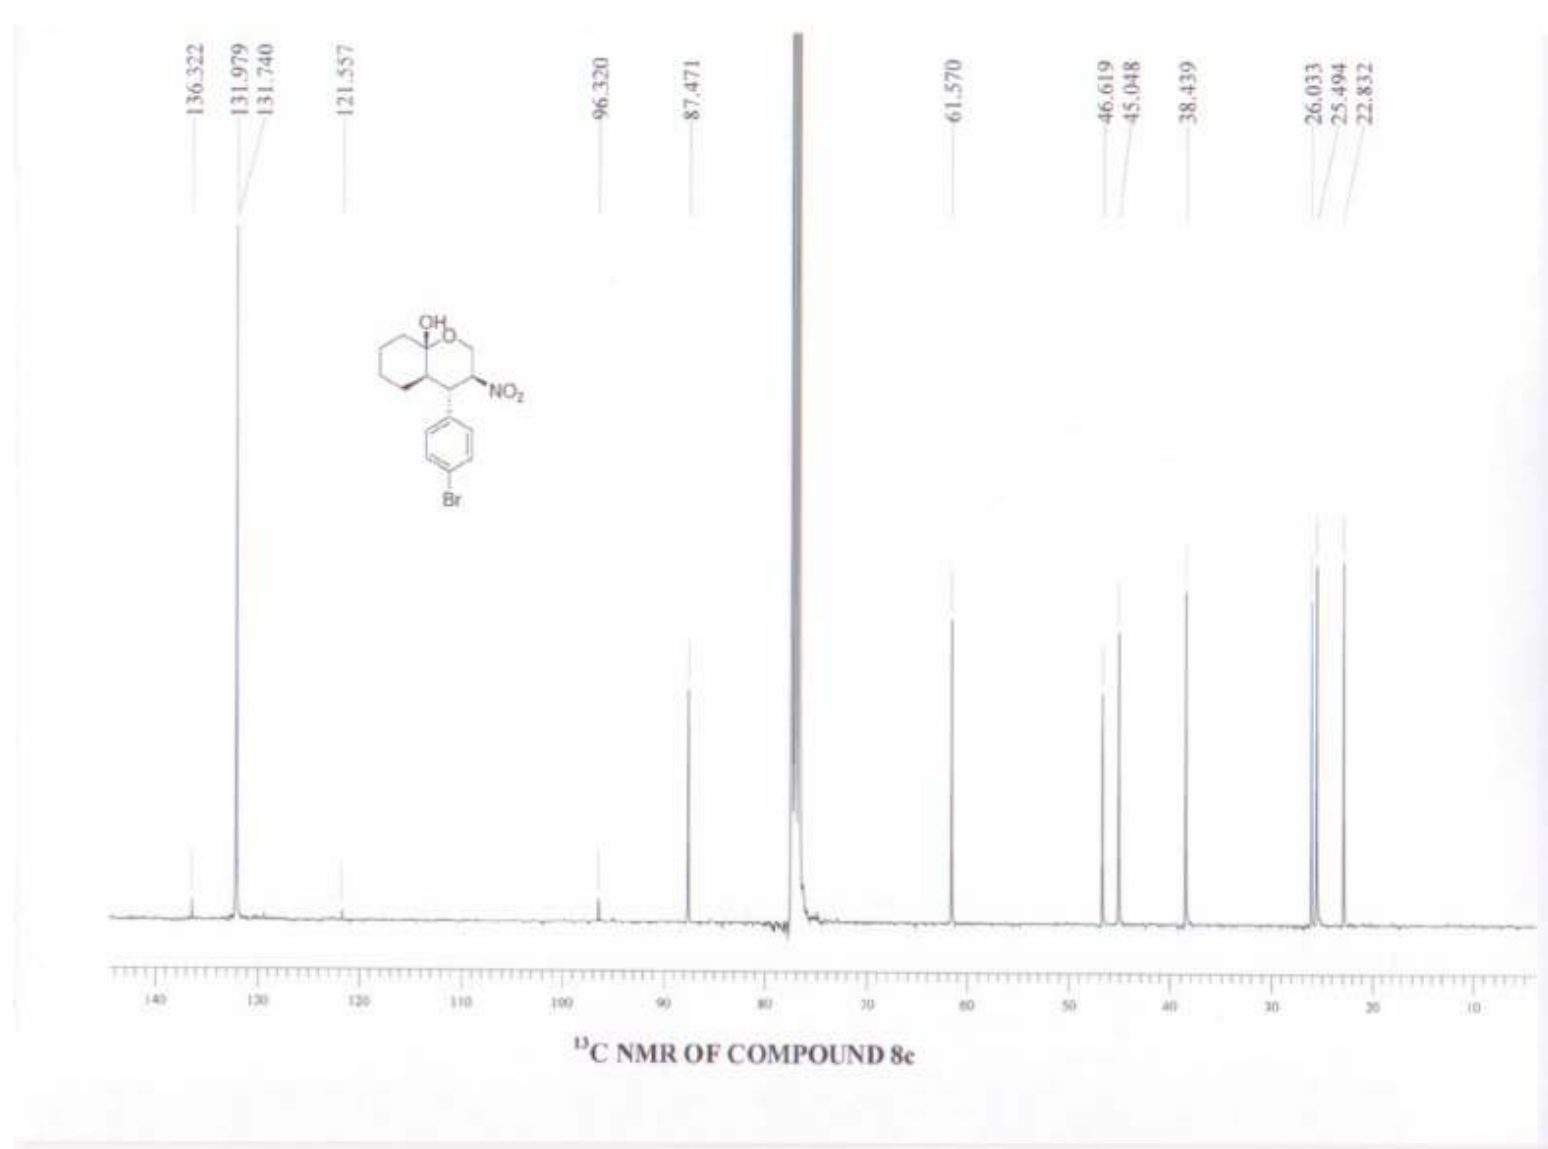

Enantiopure cycloalkane fused tetrahydro pyrans through domino Michael–ketalizations with organocatalysis

Srivari Chandrasekhar, Kundarapu Mallikarjun, Gangireddy Pavankumarreddy, Veera Mohan and Bharatam Jagadeesh



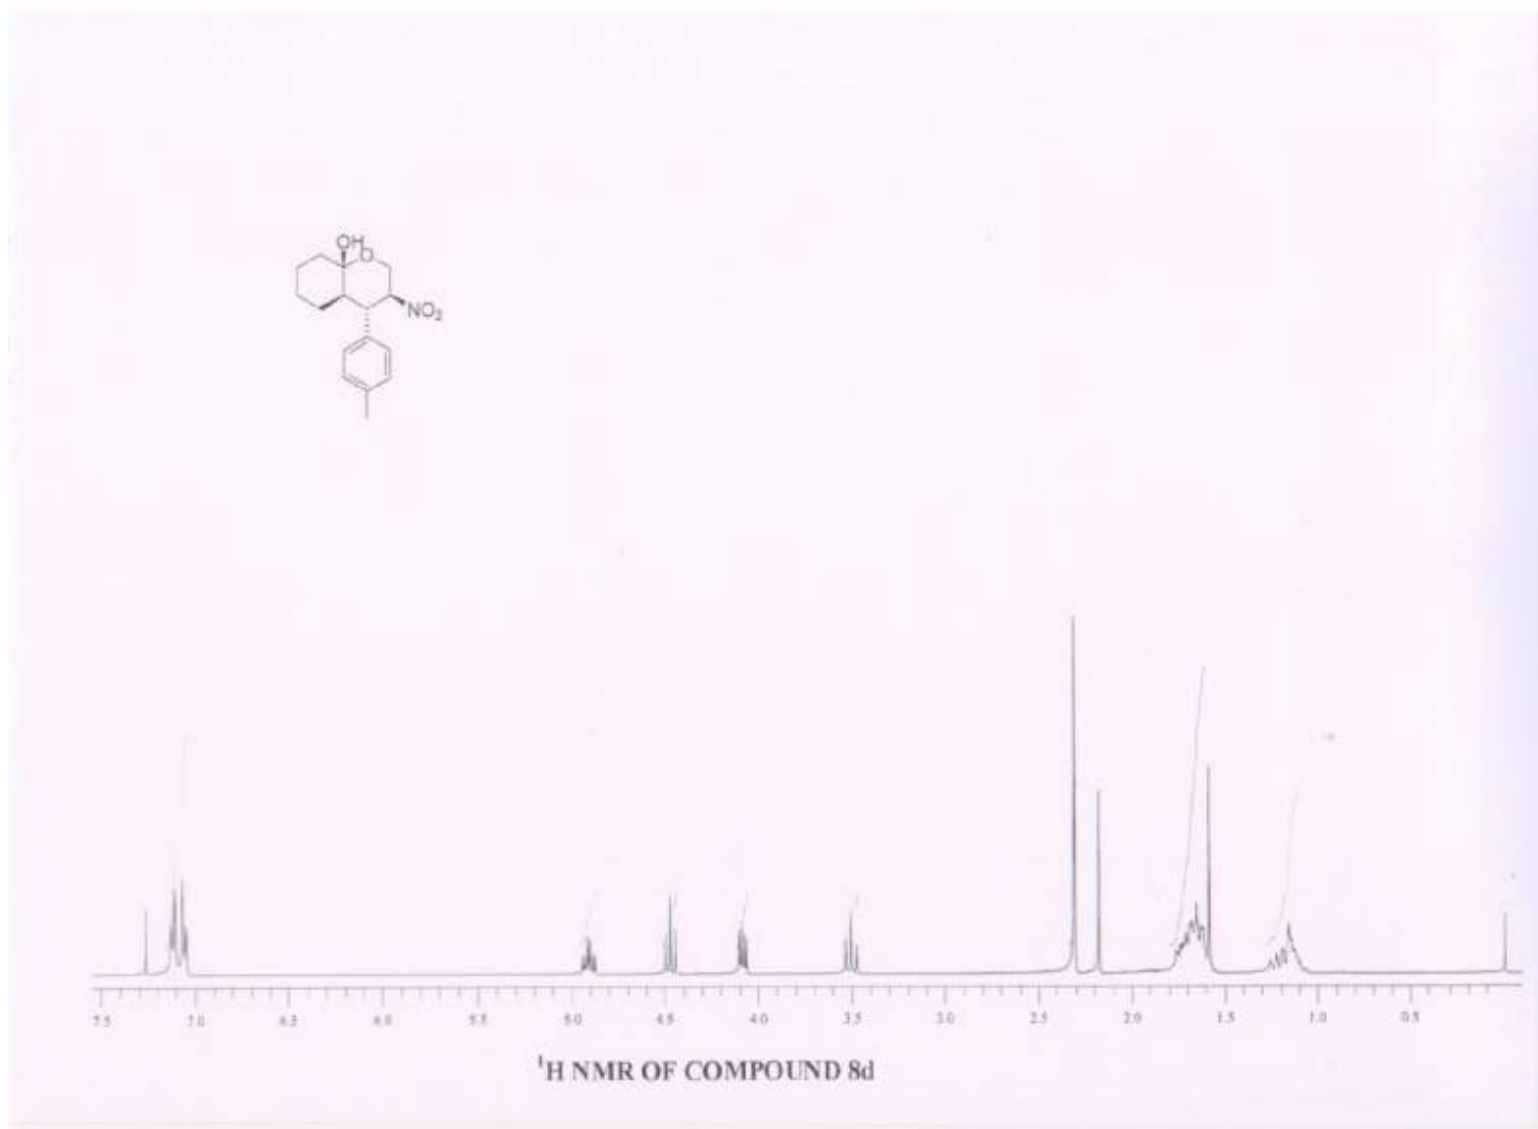

Enantiopure cycloalkane fused tetrahydro pyrans through domino Michael–ketalizations with organocatalysis

Srivari Chandrasekhar, Kundarapu Mallikarjun, Gangireddy Pavankumarreddy, Veera Mohan and Bharatam Jagadeesh

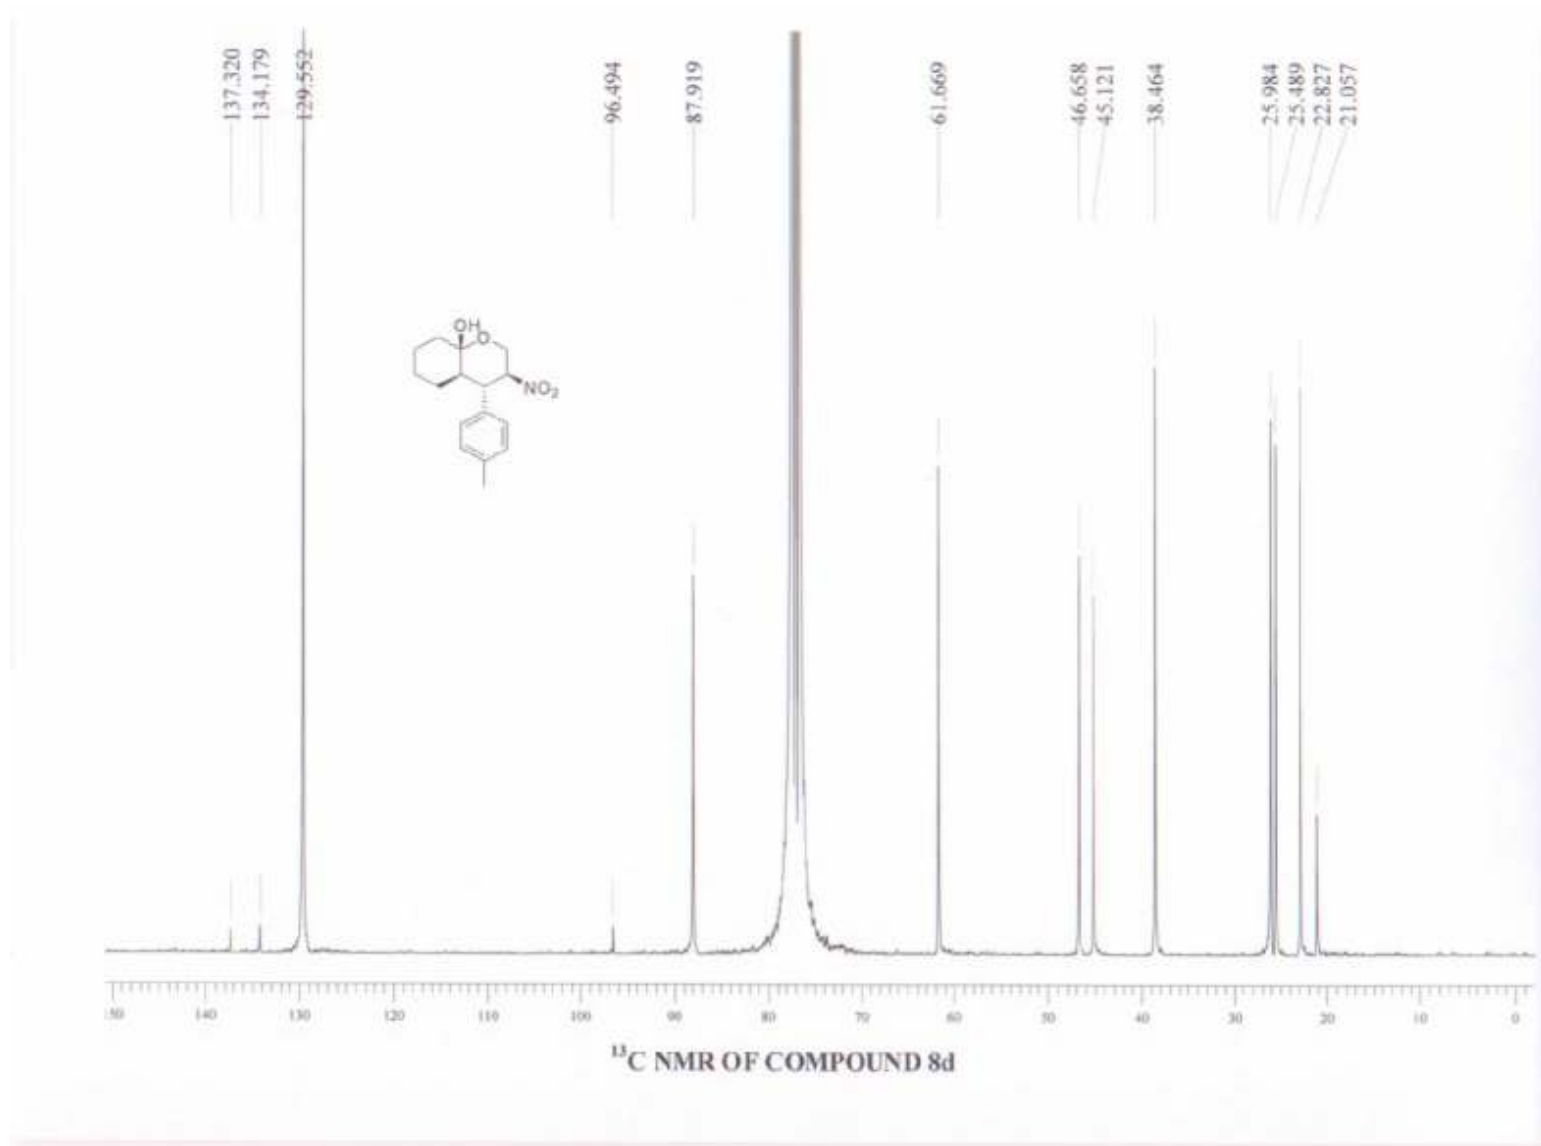

Enantiopure cycloalkane fused tetrahydro pyrans through domino Michael–ketalizations with organocatalysis

Srivari Chandrasekhar, Kundarapu Mallikarjun, Gangireddy Pavankumarreddy, Veera Mohan and Bharatam Jagadeesh

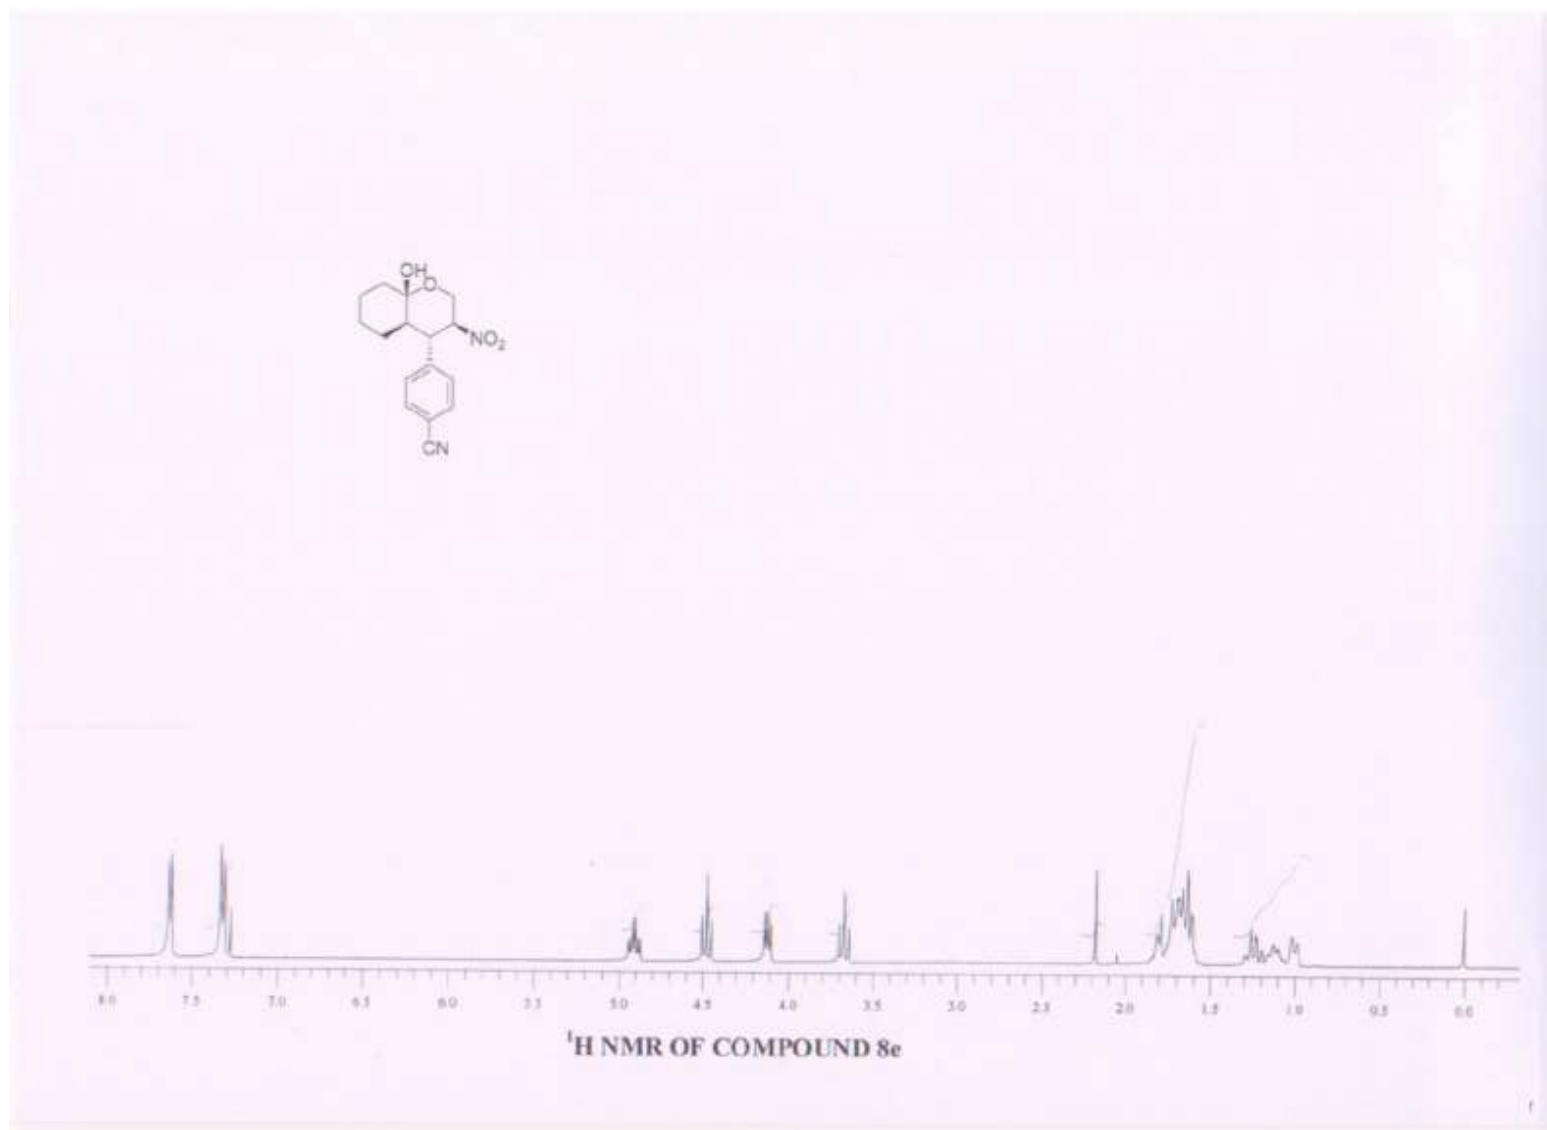

Enantiopure cycloalkane fused tetrahydro pyrans through domino Michael–ketalizations with organocatalysis

Srivari Chandrasekhar, Kundarapu Mallikarjun, Gangireddy Pavankumarreddy, Veera Mohan and Bharatam Jagadeesh

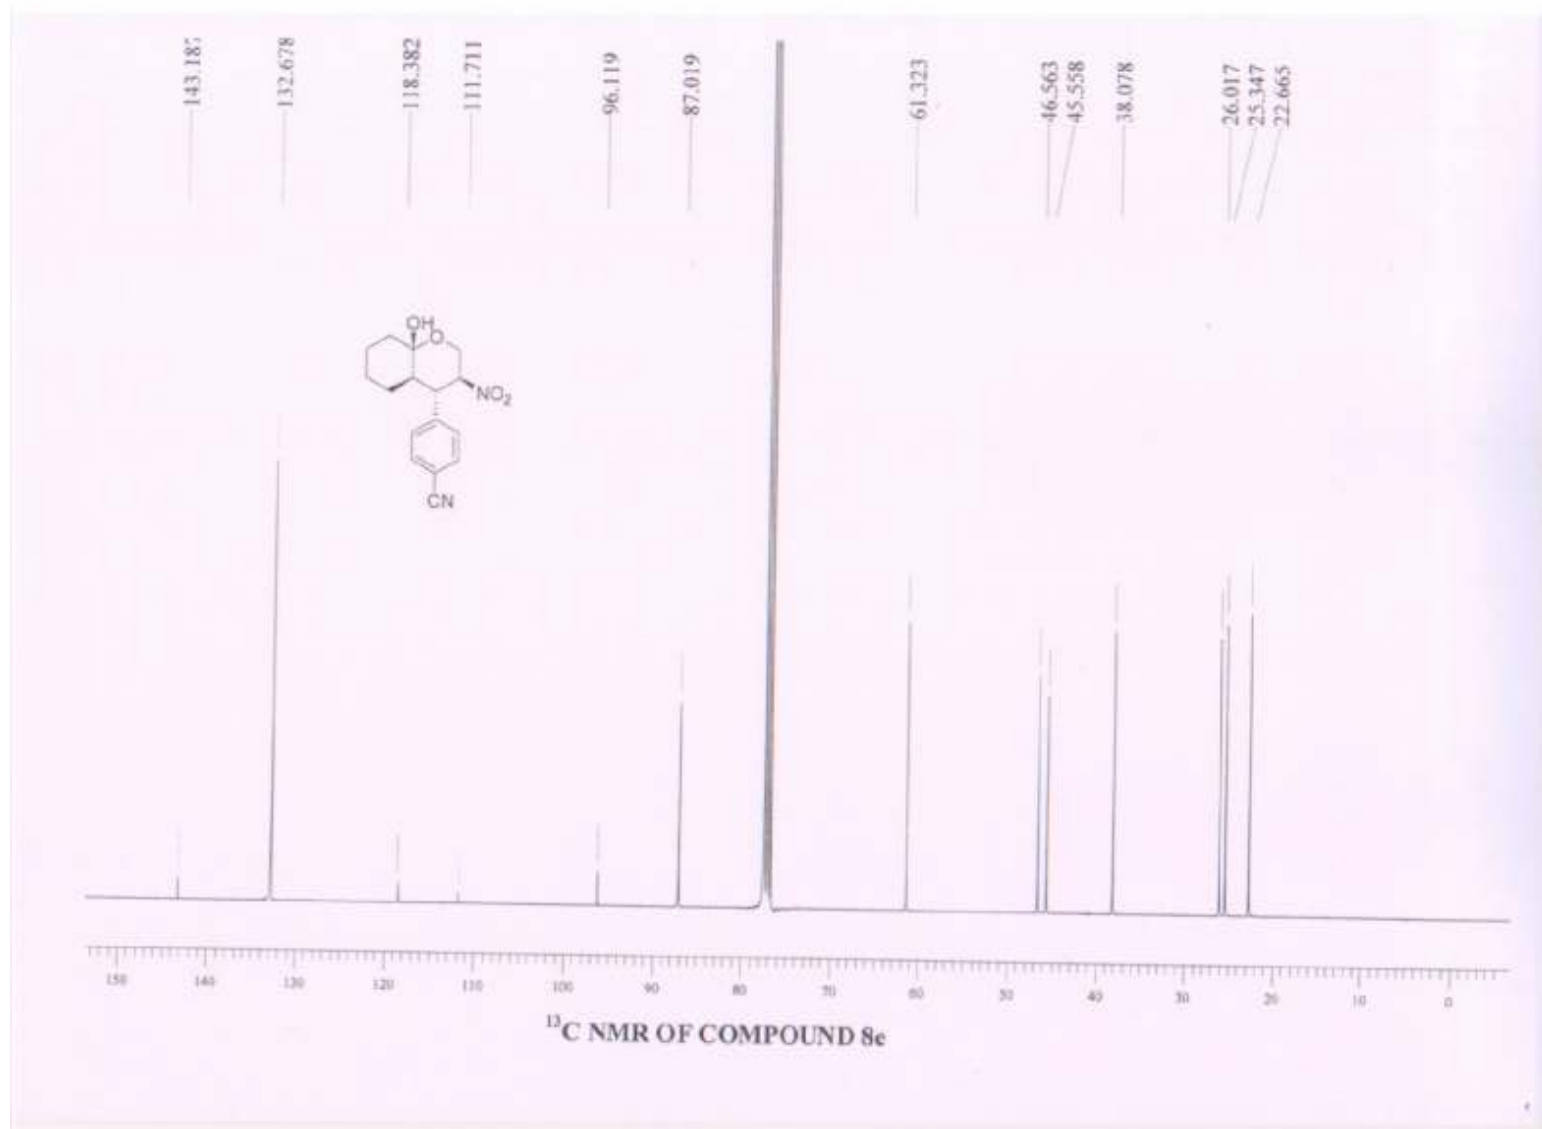

Enantiopure cycloalkane fused tetrahydro pyrans through domino Michael–ketalizations with organocatalysis

Srivari Chandrasekhar, Kundarapu Mallikarjun, Gangireddy Pavankumarreddy, Veera Mohan and Bharatam Jagadeesh

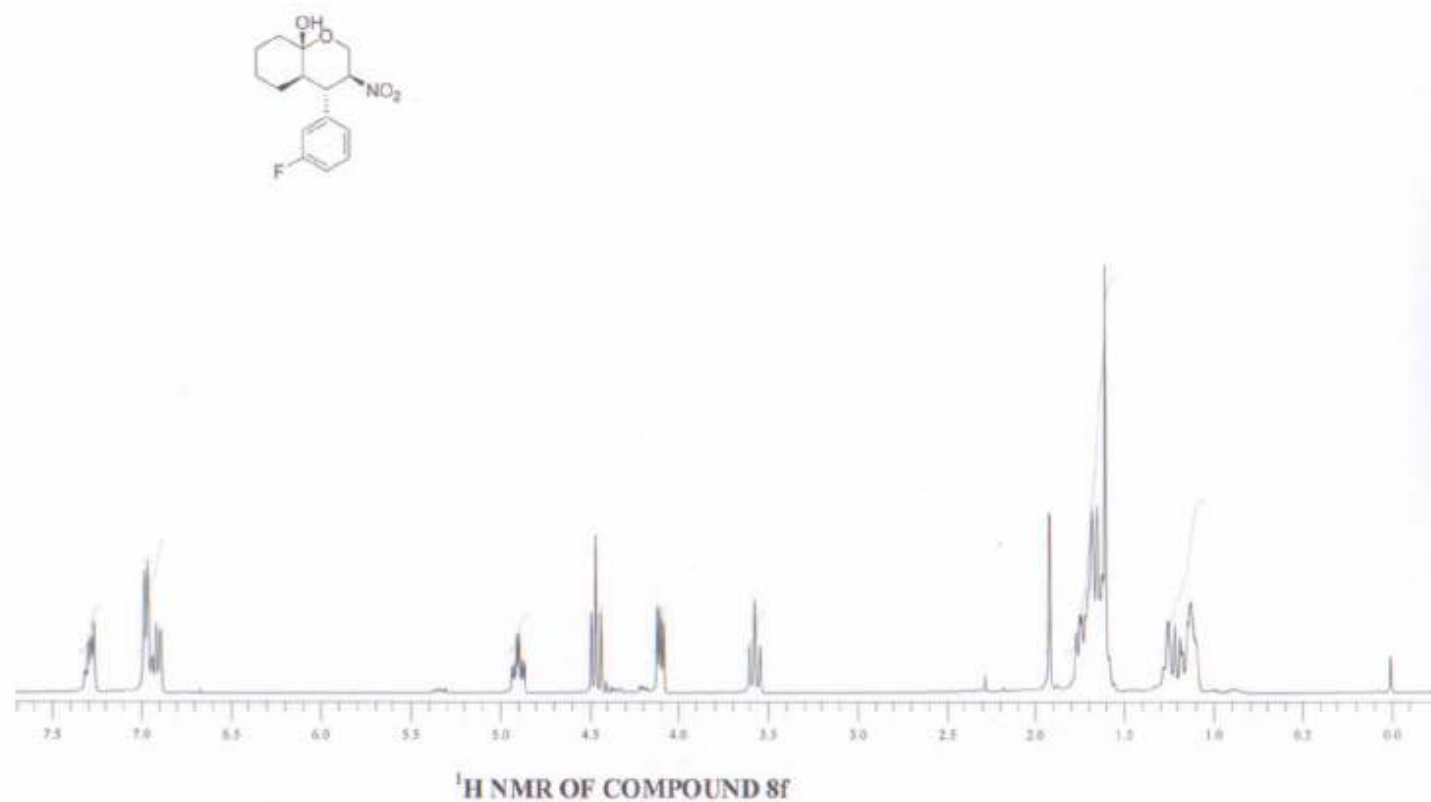

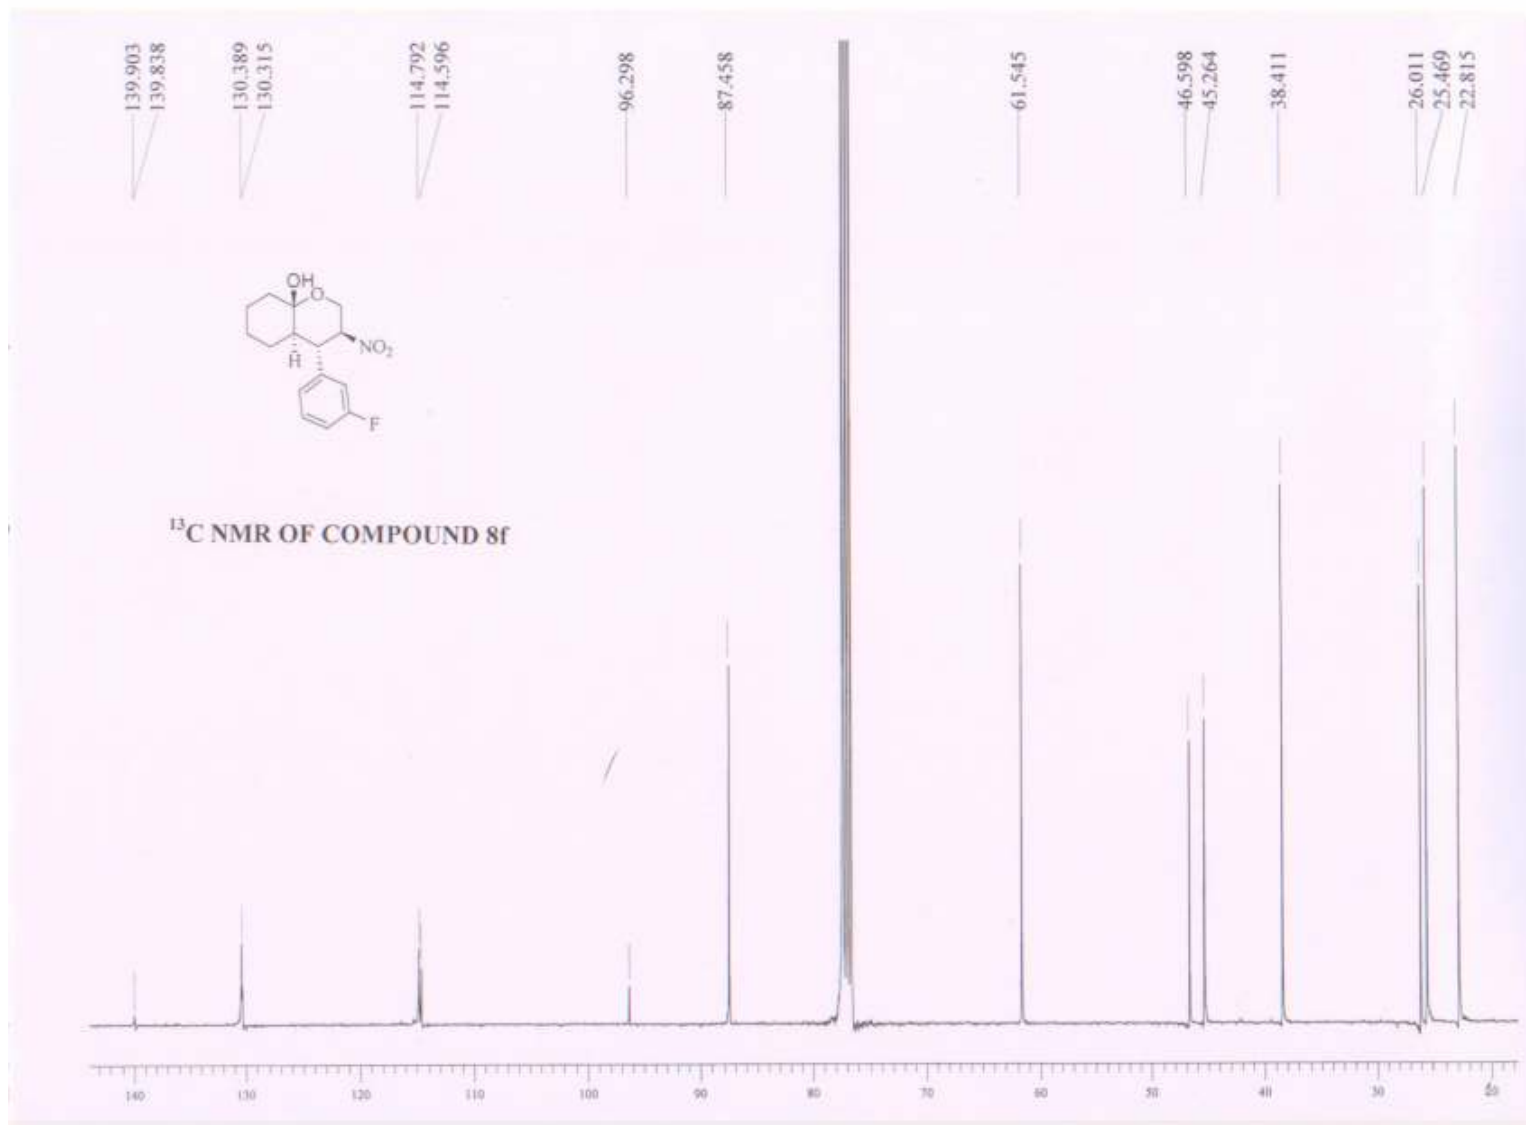

Enantiopure cycloalkane fused tetrahydro pyrans through domino Michael–ketalizations with organocatalysis

Srivari Chandrasekhar, Kundarapu Mallikarjun, Gangireddy Pavankumarreddy, Veera Mohan and Bharatam Jagadeesh

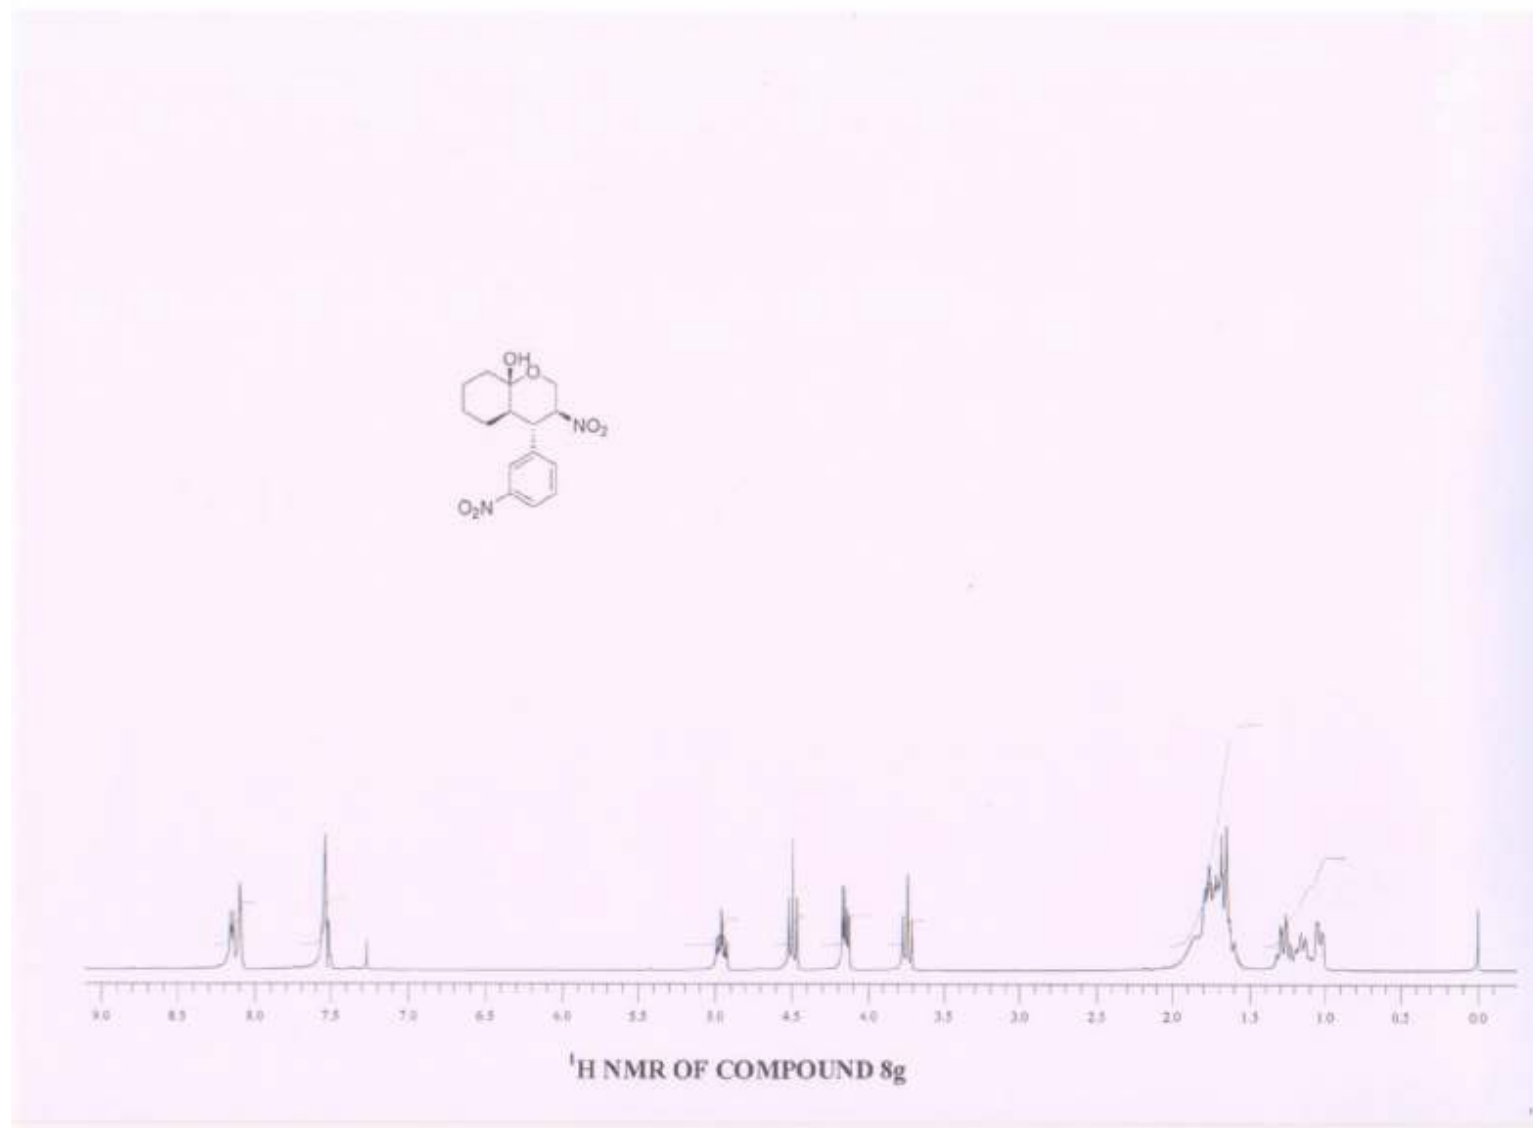

Enantiopure cycloalkane fused tetrahydro pyrans through domino Michael–ketalizations with organocatalysis

Srivari Chandrasekhar, Kundarapu Mallikarjun, Gangireddy Pavankumarreddy, Veera Mohan and Bharatam Jagadeesh

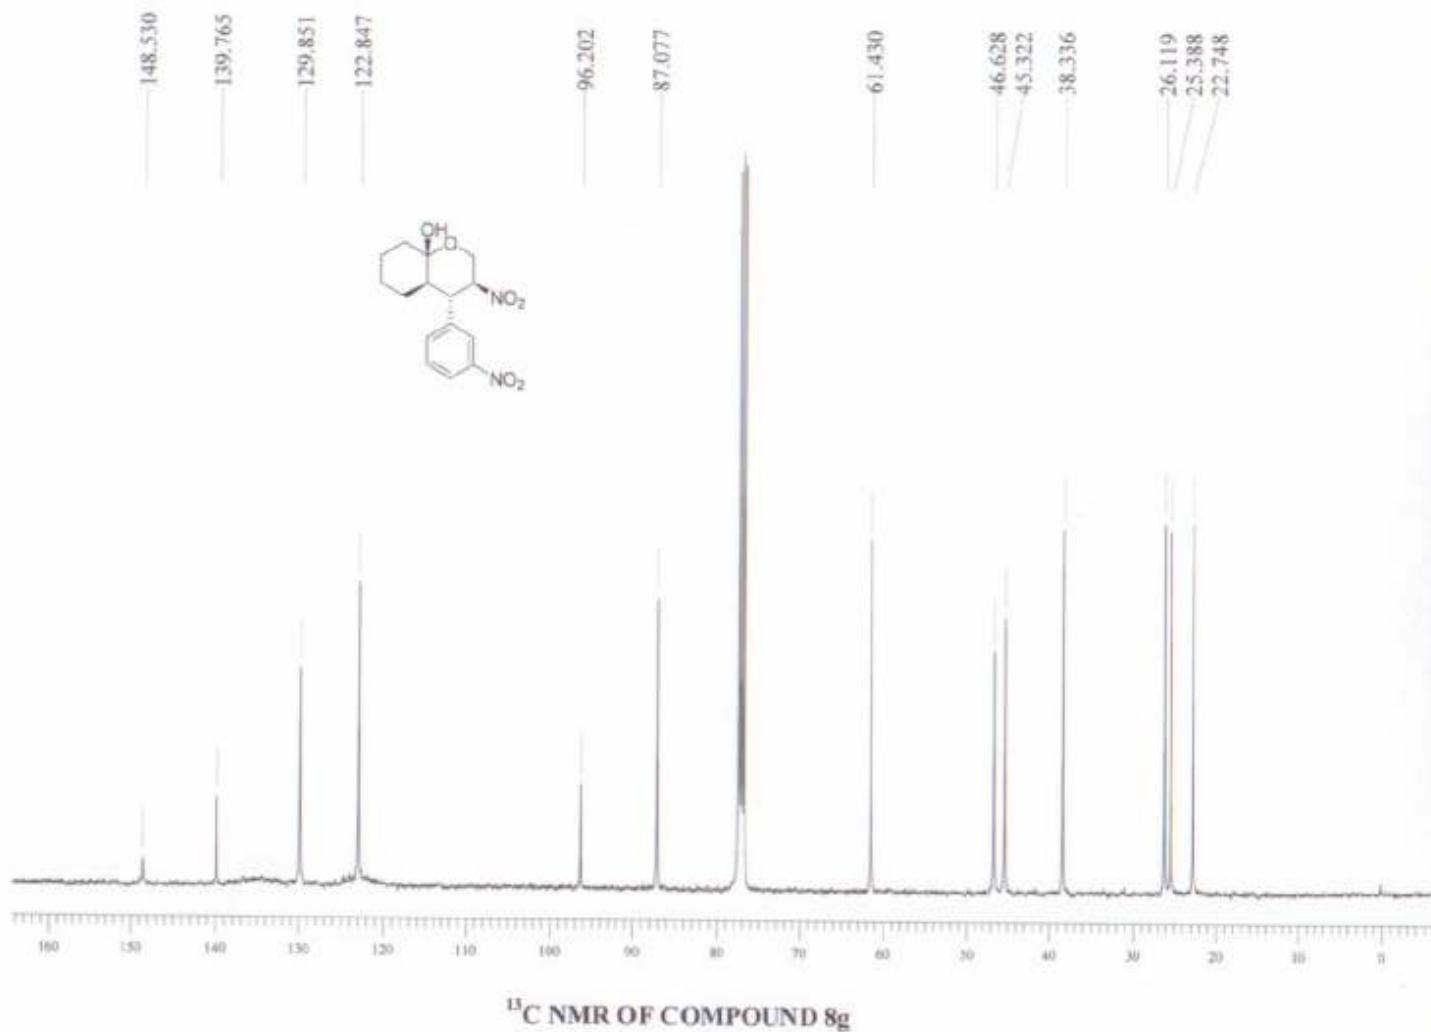

Enantiopure cycloalkane fused tetrahydro pyrans through domino Michael–ketalizations with organocatalysis

Srivari Chandrasekhar, Kundarapu Mallikarjun, Gangireddy Pavankumarreddy, Veera Mohan and Bharatam Jagadeesh



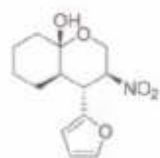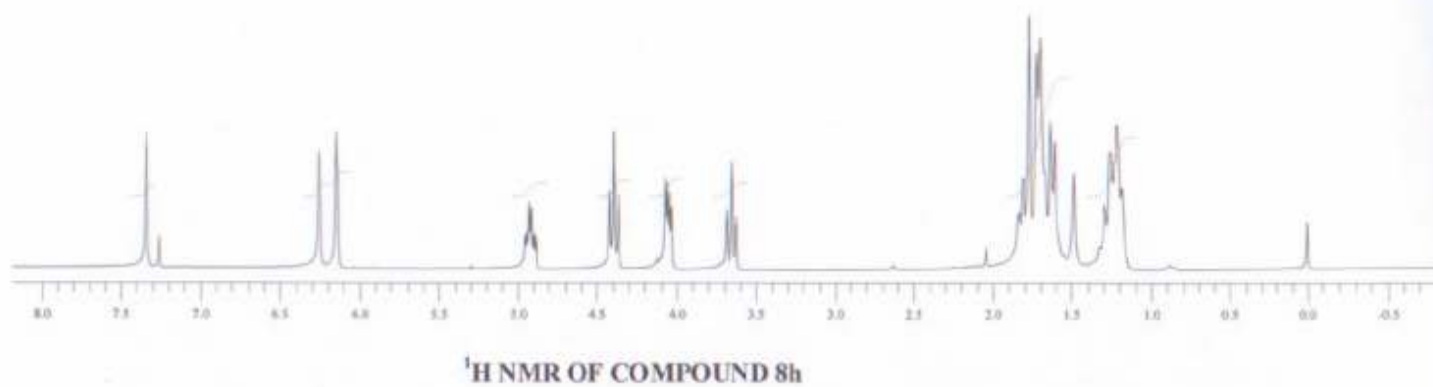

Enantiopure cycloalkane fused tetrahydro pyrans through domino Michael–ketalizations with organocatalysis

Srivari Chandrasekhar, Kundarapu Mallikarjun, Gangireddy Pavankumarreddy, Veera Mohan and Bharatam Jagadeesh



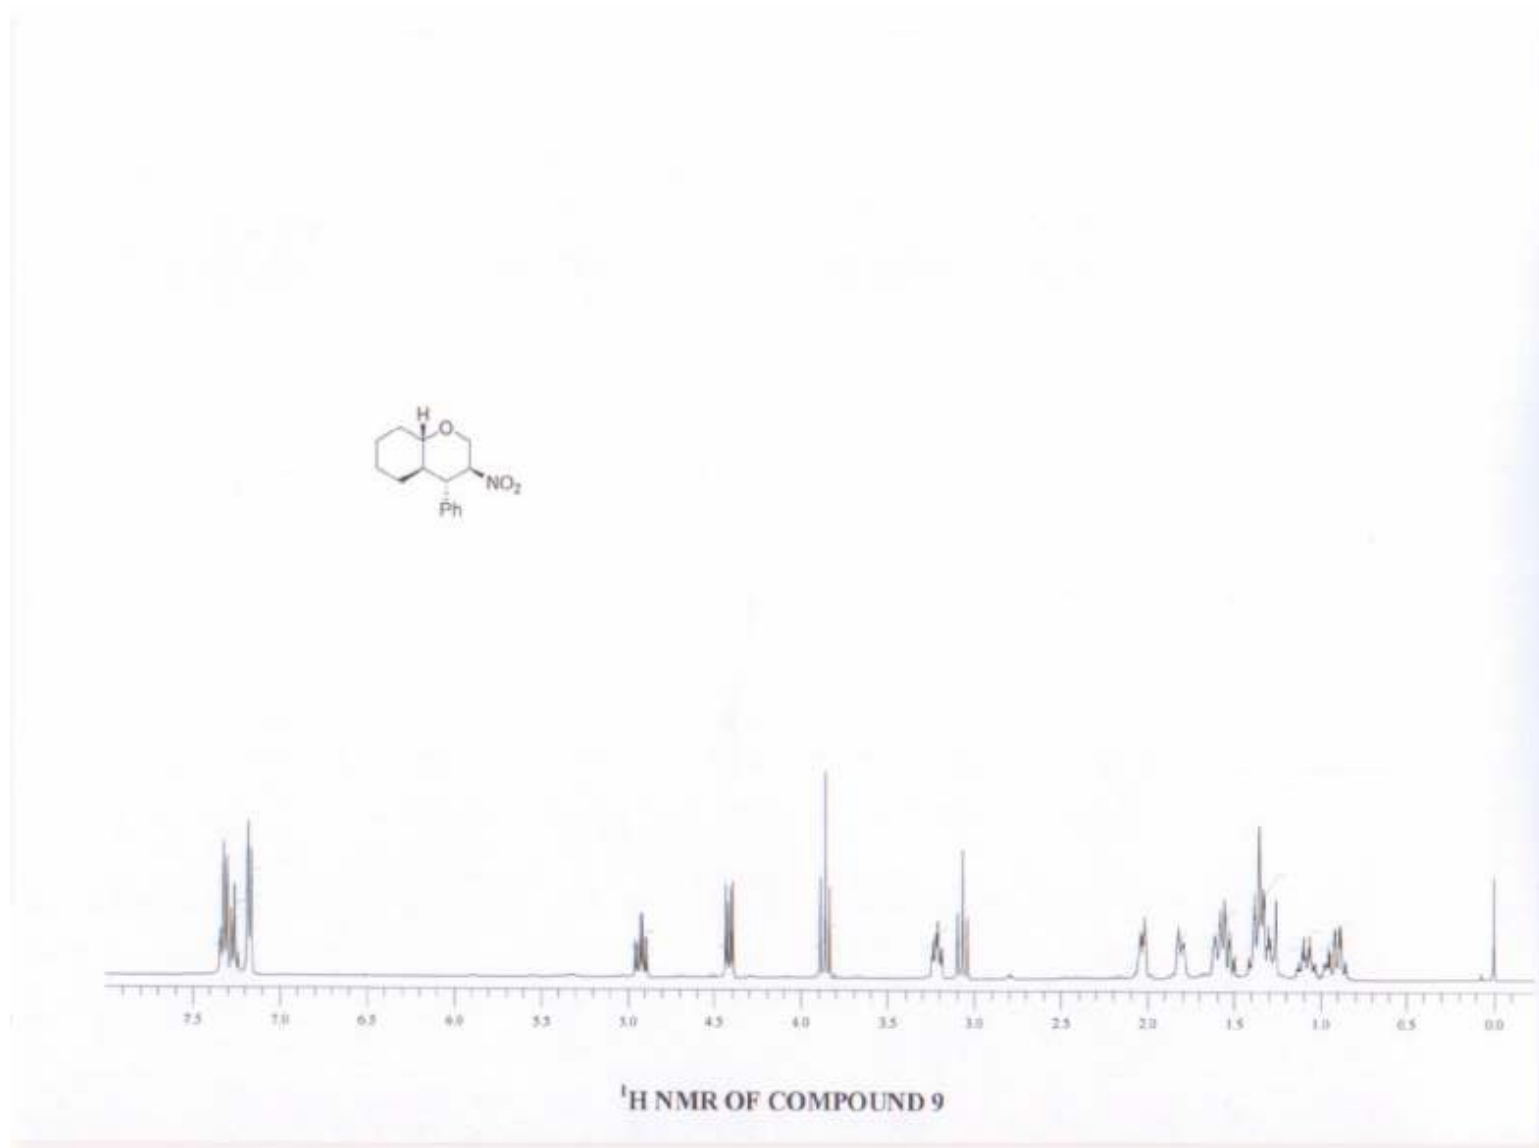

Enantiopure cycloalkane fused tetrahydro pyrans through domino Michael–ketalizations with organocatalysis

Srivari Chandrasekhar, Kundarapu Mallikarjun, Gangireddy Pavankumarreddy, Veera Mohan and Bharatam Jagadeesh

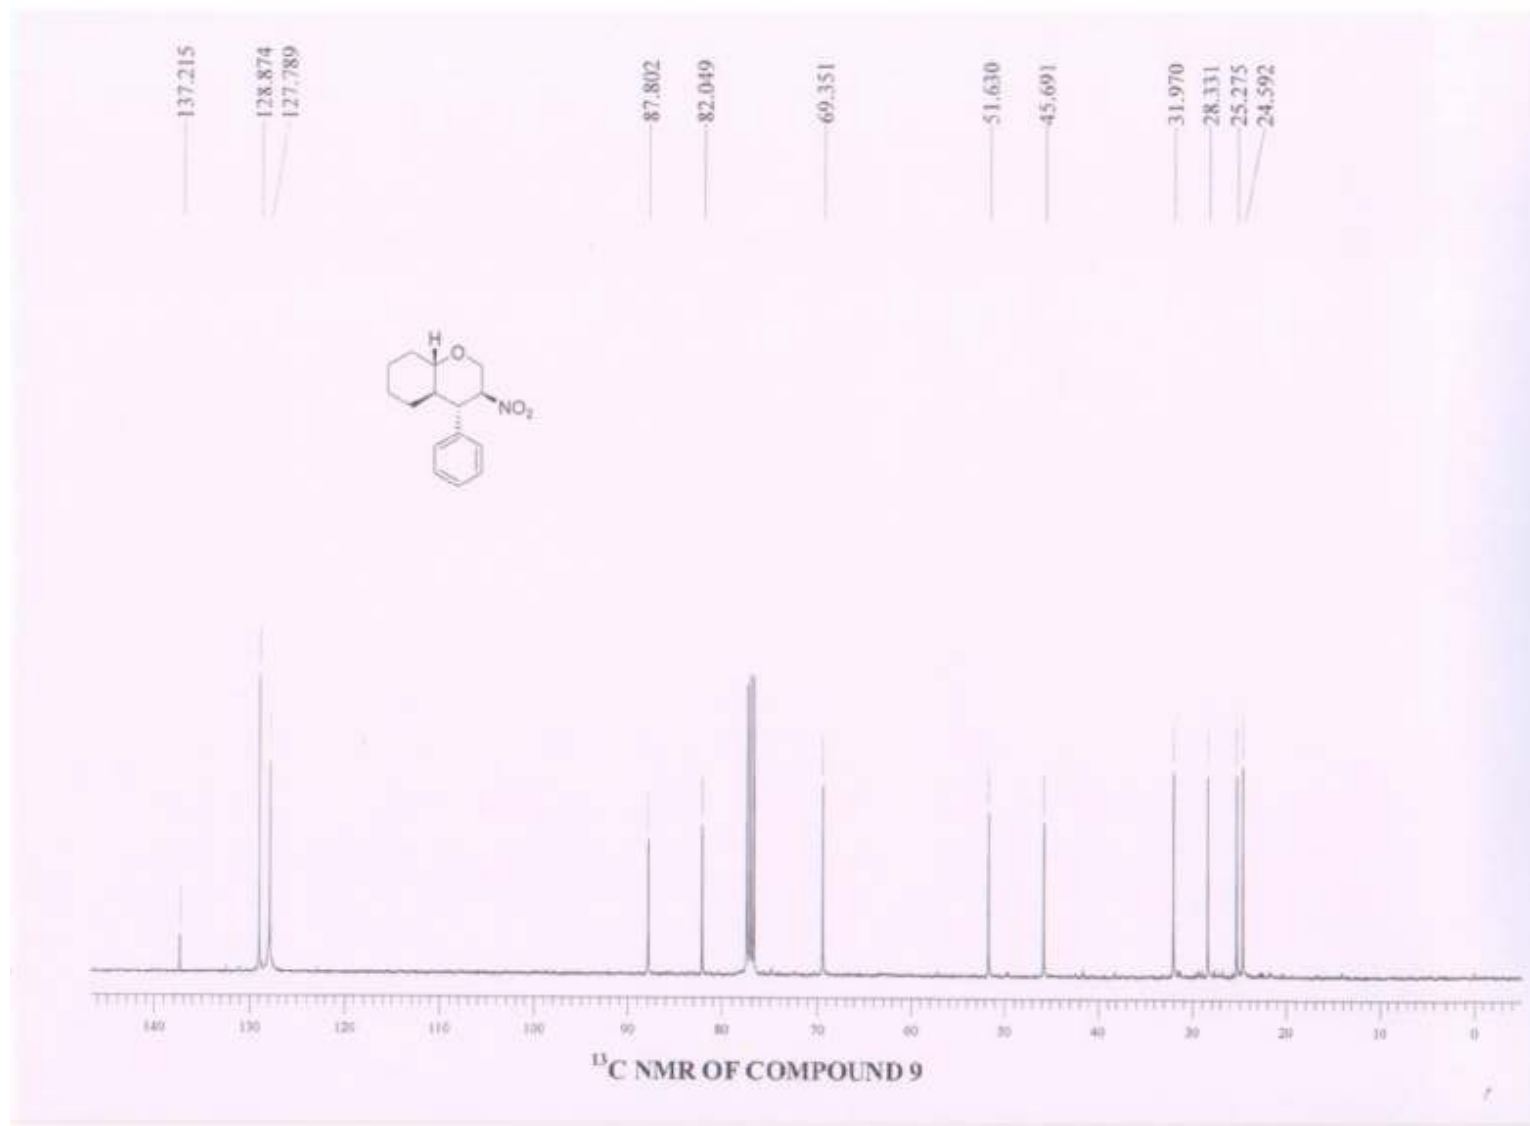

Enantiopure cycloalkane fused tetrahydro pyrans through domino Michael–ketalizations with organocatalysis

Srivari Chandrasekhar, Kundarapu Mallikarjun, Gangireddy Pavankumarreddy, Veera Mohan and Bharatam Jagadeesh

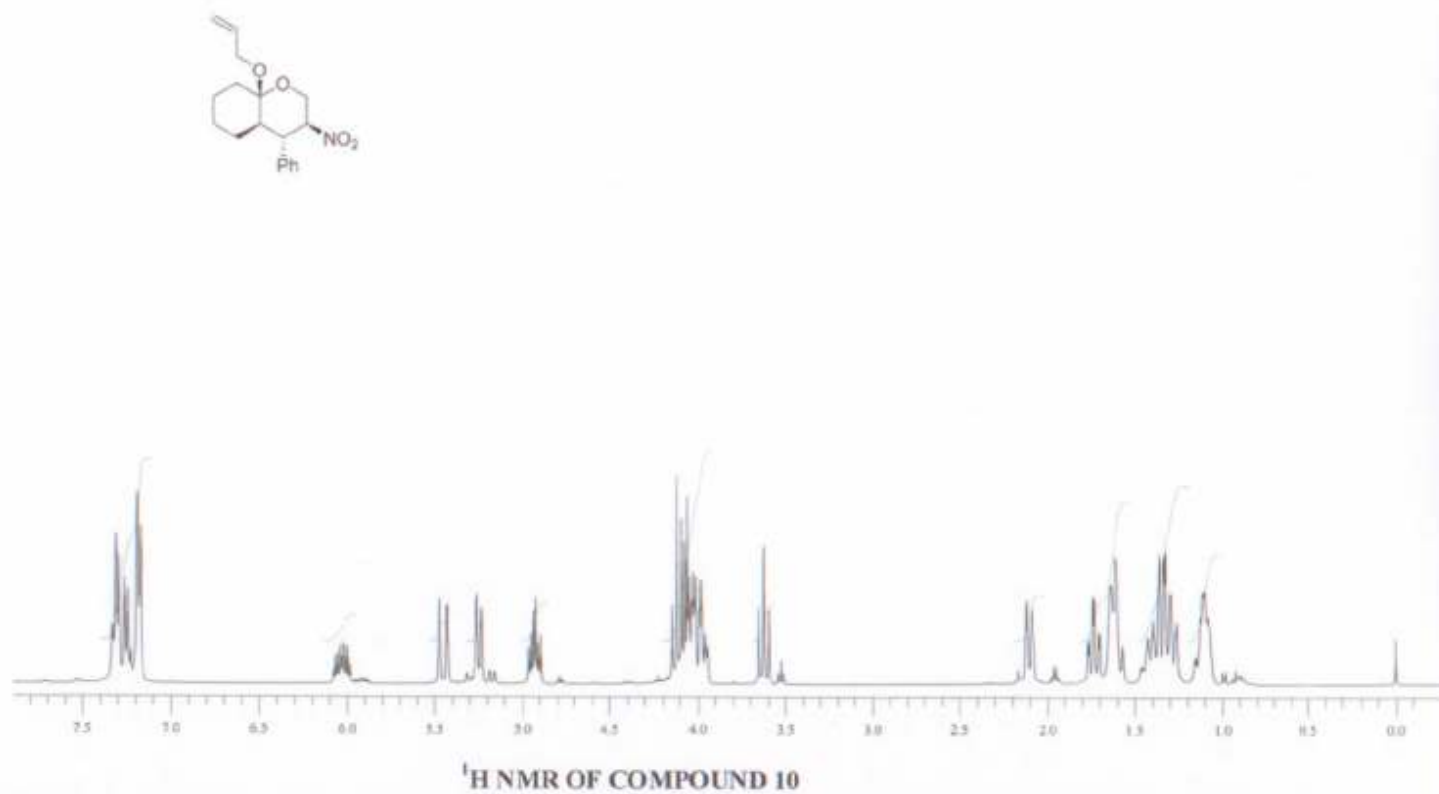

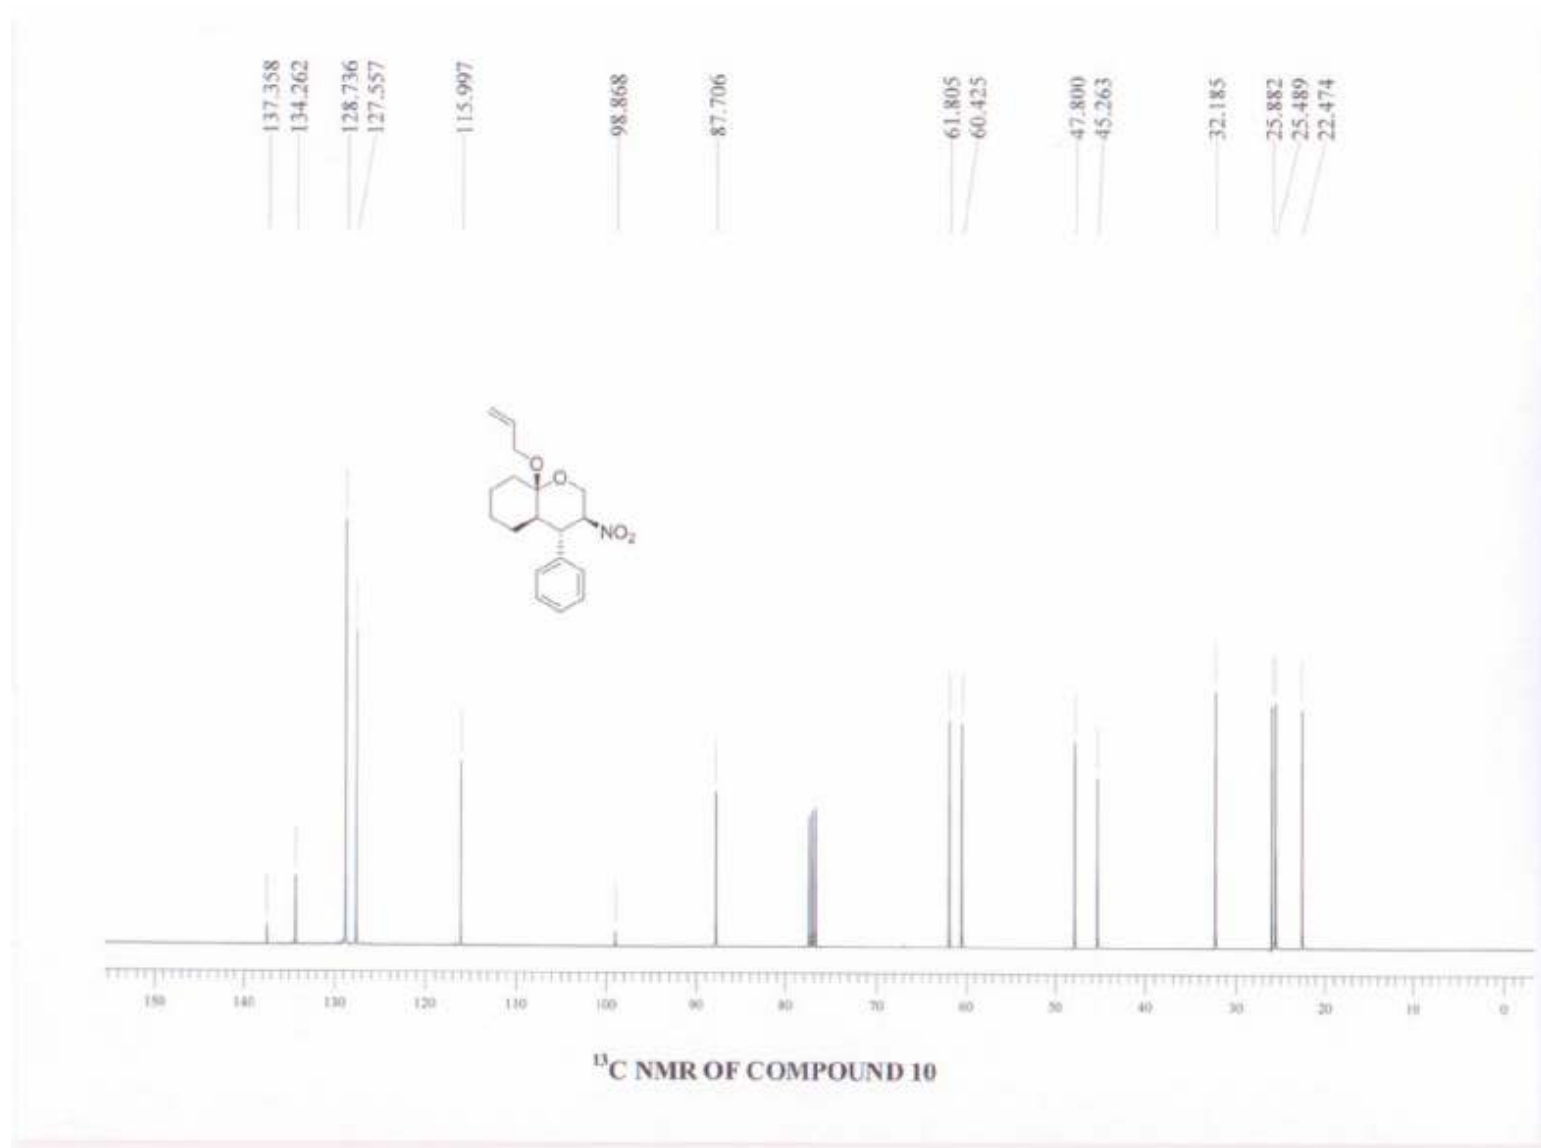

Enantiopure cycloalkane fused tetrahydro pyrans through domino Michael–ketalizations with organocatalysis

Srivari Chandrasekhar, Kundarapu Mallikarjun, Gangireddy Pavankumarreddy, Veera Mohan and Bharatam Jagadeesh

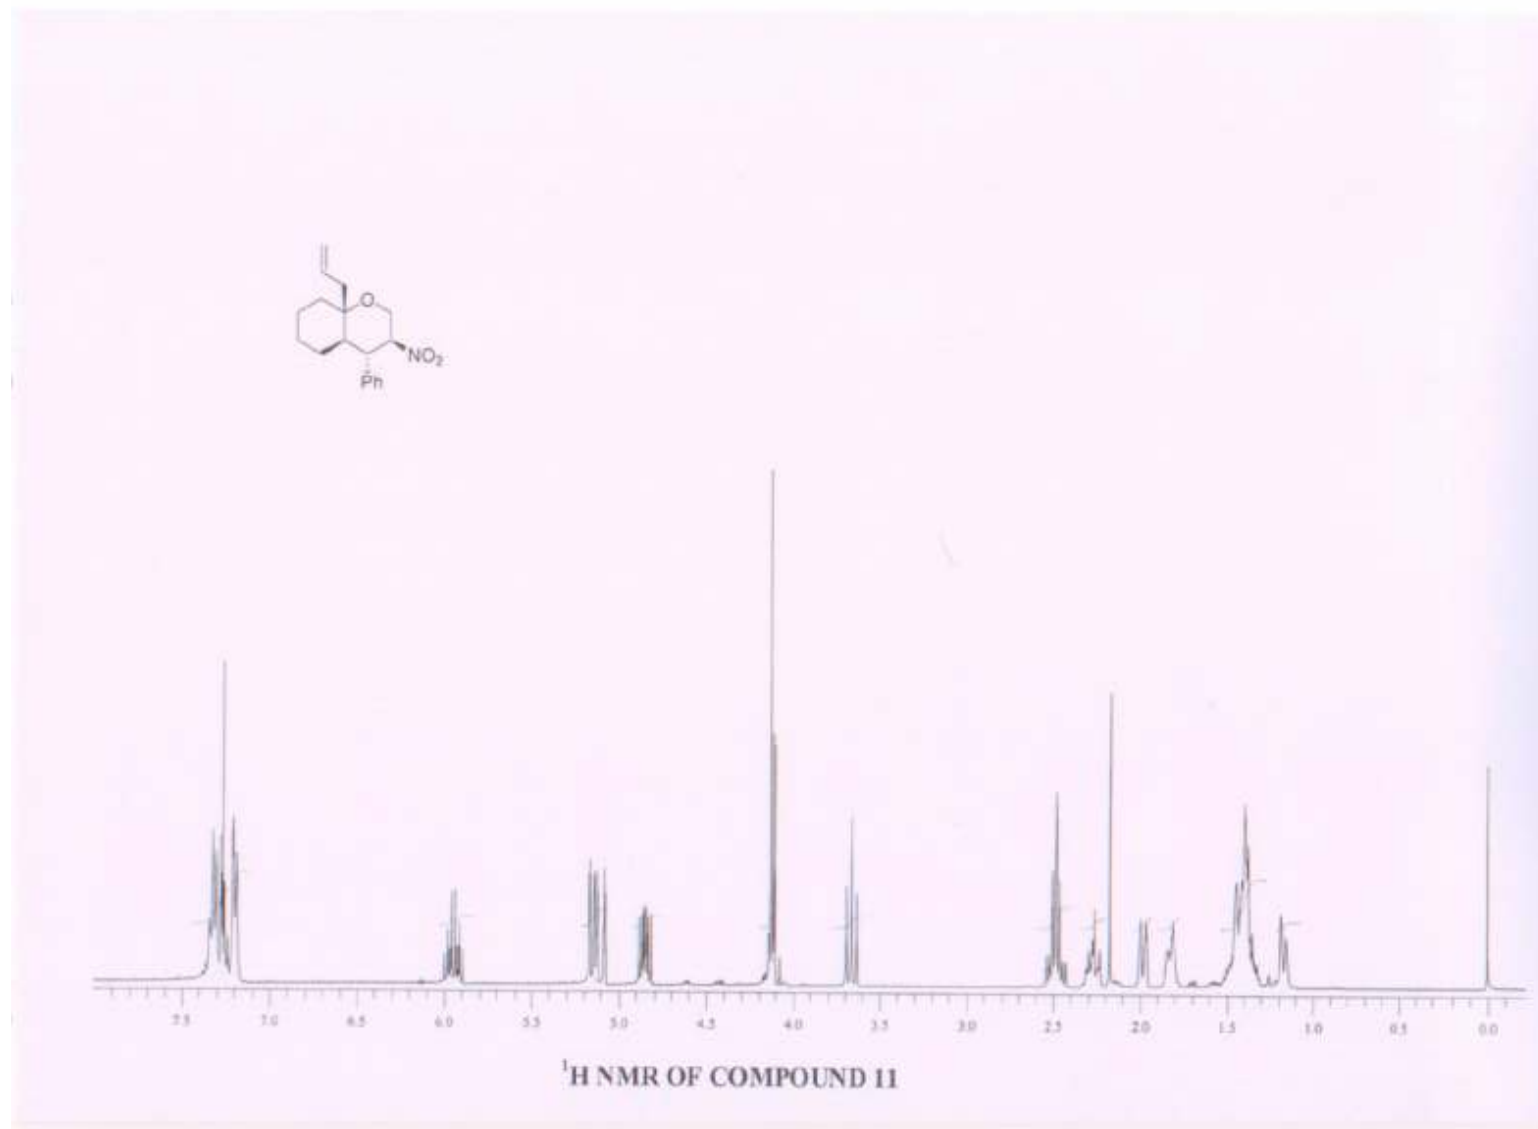

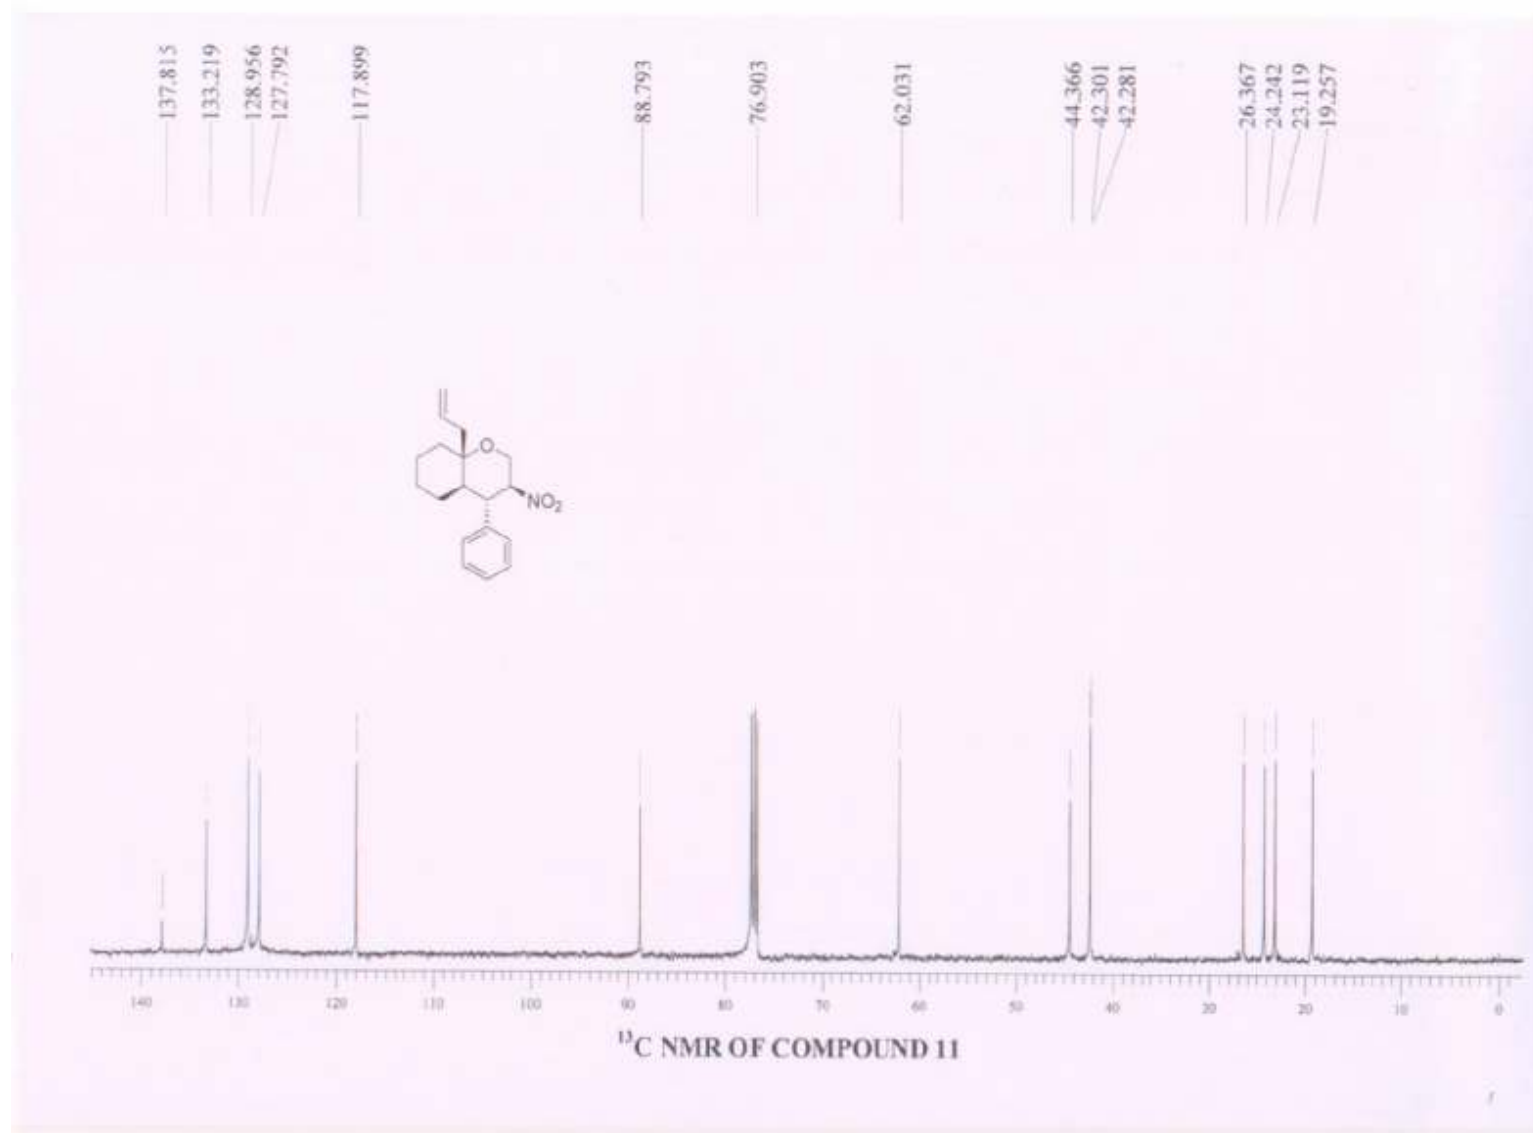

Enantiopure cycloalkane fused tetrahydro pyrans through domino Michael–ketalizations with organocatalysis

Srivari Chandrasekhar, Kundarapu Mallikarjun, Gangireddy Pavankumarreddy, Veera Mohan and Bharatam Jagadeesh



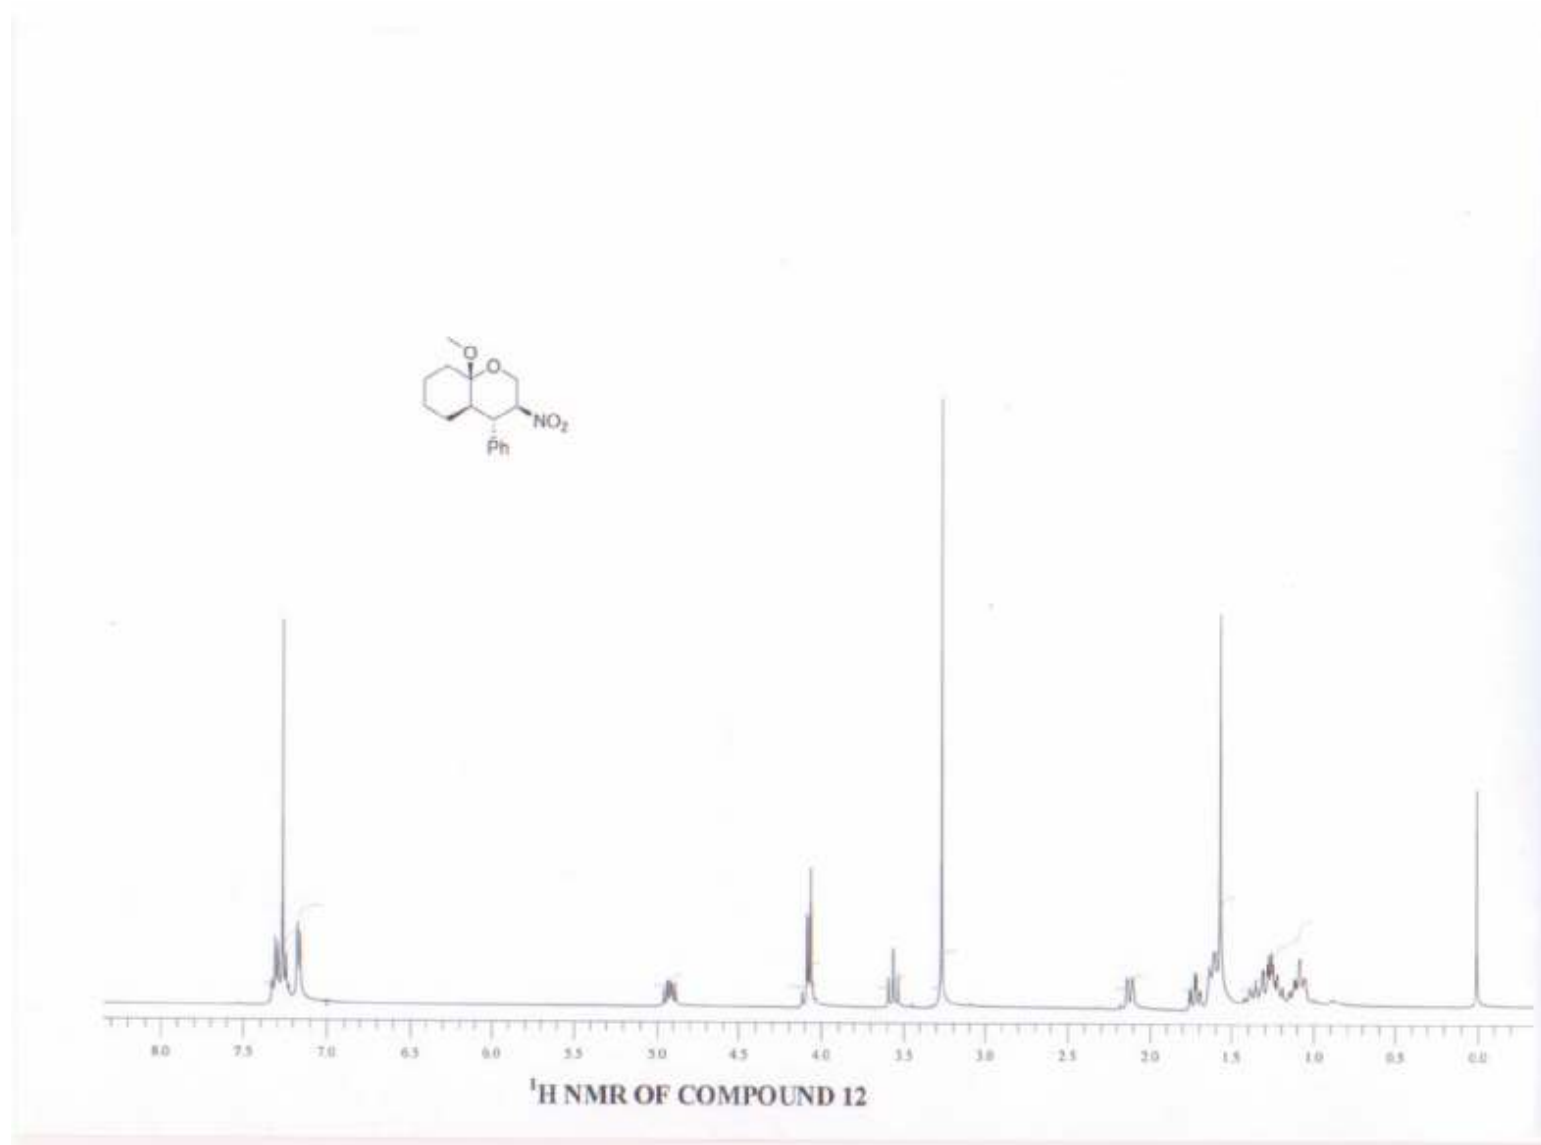

Enantiopure cycloalkane fused tetrahydro pyrans through domino Michael–ketalizations with organocatalysis

Srivari Chandrasekhar, Kundarapu Mallikarjun, Gangireddy Pavankumarreddy, Veera Mohan and Bharatam Jagadeesh

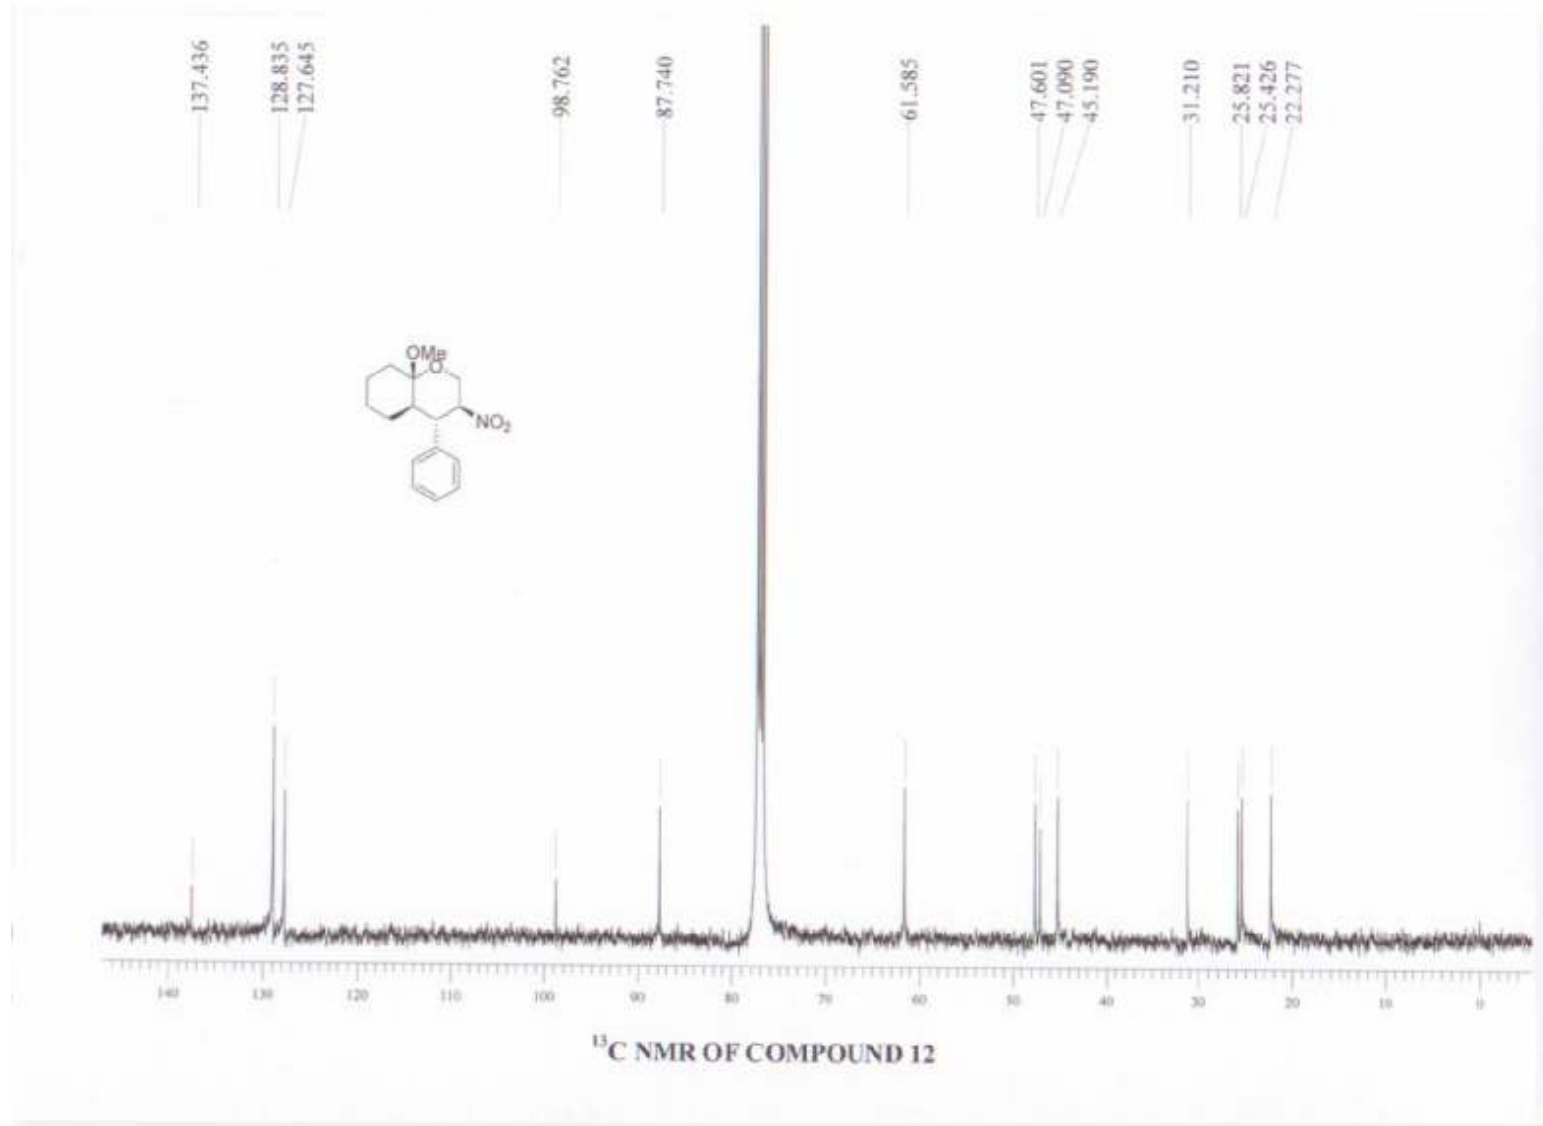

Enantiopure cycloalkane fused tetrahydro pyrans through domino Michael–ketalizations with organocatalysis

Srivari Chandrasekhar, Kundarapu Mallikarjun, Gangireddy Pavankumarreddy, Veera Mohan and Bharatam Jagadeesh

6/13/2009 12:09:01 171

# HPLC-REPORT OF RACEMIC 8a

Acquired by : Admin  
Sample Name : scs-277-racemic  
Sample ID : scs-277-racemic  
Vial # : 18  
Injection Volume : 20 uL  
Data File Name : 15-05-09.....008.lcd  
Method File Name : gen.lcm  
Batch File Name : 15-05-09.....lcb  
Report File Name : NPL HPLC REPORT new.lcr  
Data Acquired : 5/15/2009 10:38:03 PM  
Data Processed : 6/11/2009 4:29:30 PM  
Mobile phase:10% Ipa in HexaneColumn:Eurolcel 01:250X4.6mm,5uFlowrate:1.0ml/minDetection:225nm

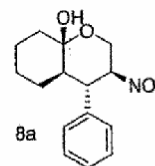

## <Chromatogram>

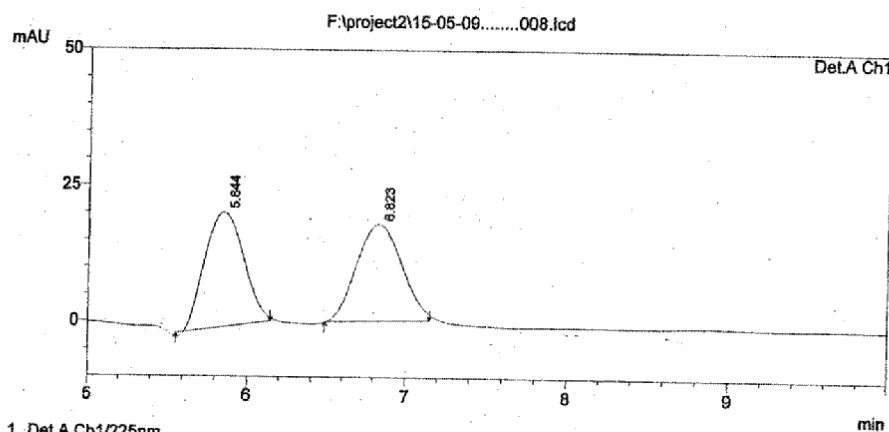

1 Det.A Ch1/225nm

PeakTable

| Peak# | Ret. Time | Area   | Height | Area %  |
|-------|-----------|--------|--------|---------|
| 1     | 5.844     | 347146 | 20946  | 49.972  |
| 2     | 6.823     | 347531 | 17681  | 50.028  |
| Total |           | 694677 | 38627  | 100.000 |

F:\project2 5-05-09.....008.lcd

## HPLC-REPORT OF CHIRAL 8a

F:\project2\15-05-09.....009.lcd

Acquired by : Admin  
Sample Name : scs-277-chiral  
Sample ID : scs-277-chiral  
Vial # : 19  
Injection Volume : 20 uL  
Data File Name : 15-05-09.....009.lcd  
Method File Name : gen.lcm  
Batch File Name : 15-05-09.....lcb  
Report File Name : NPL HPLC REPORT new.lcr  
Data Acquired : 5/15/2009 11:09:20 PM  
Data Processed : 6/11/2009 4:20:51 PM  
Mobile phase: 10% Ipa in HexaneColumn: Eurocel 01:250X4.6mm, 5uFlowrate: 1.0ml/minDetection: 225nm

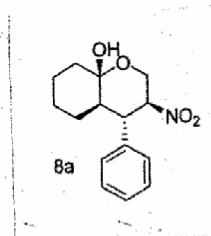

### <Chromatogram>

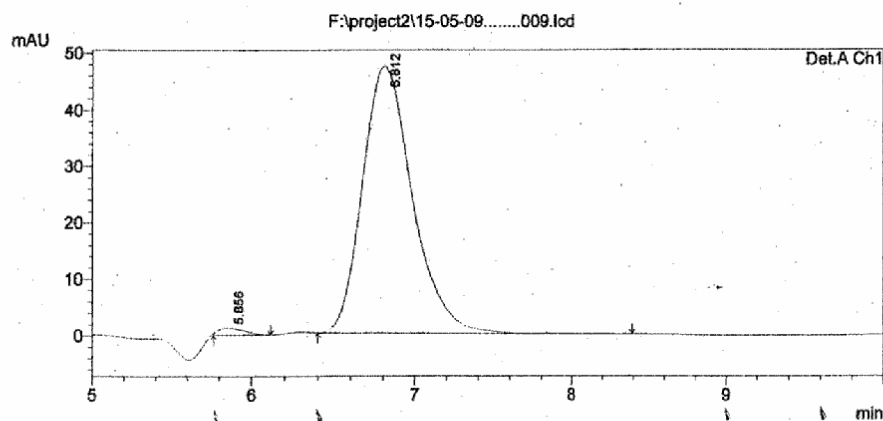

1 Det.A Ch1/225nm

PeakTable

Detector A Ch1 225nm

| Peak# | Ret. Time | Area    | Height | Area %  |
|-------|-----------|---------|--------|---------|
| 1     | 5.856     | 13659   | 1225   | 1.318   |
| 2     | 6.812     | 1022989 | 47207  | 98.682  |
| Total |           | 1036649 | 48432  | 100.000 |

F:\project2\15-05-09.....009.lcd

## HPLC-REPORT OF RACEMIC 8b

Acquired by : Admin  
Sample Name : scs-307-racemic  
Sample ID : scs-307-racemic  
Vial # : 24  
Injection Volume : 20 uL  
Data File Name : 15-05-09.....014.lcd  
Method File Name : gen.lcm  
Batch File Name : 15-05-09.....lcb  
Report File Name : NPL HPLC REPORT new.lcr  
Data Acquired : 5/16/2009 1:45:47 AM  
Data Processed : 6/11/2009 5:02:21 PM  
Mobile phase: 10% Ipa in Hexane Column: Eurocel 01:250X4.6mm, 5u Flowrate: 1.0ml/min Detection: 225nm

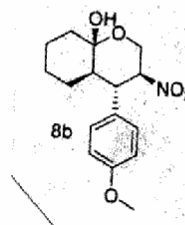

### <Chromatogram>

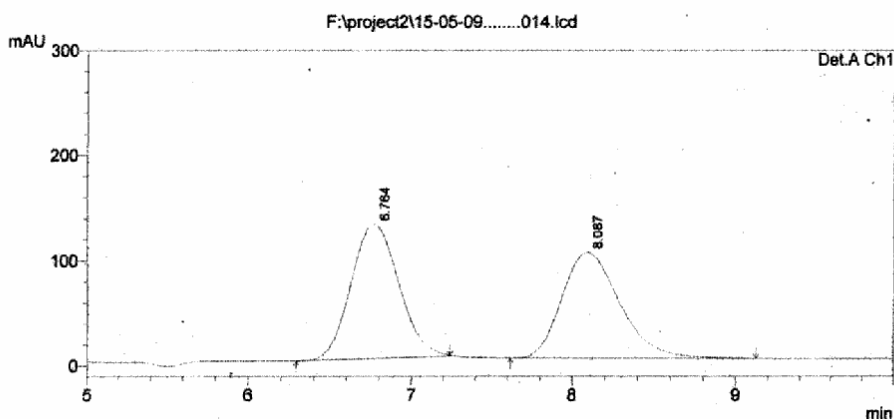

1 Det.A Ch1/225nm

PeakTable

Detector A Ch1 225nm

| Peak# | Ret. Time | Area    | Height | Area %  |
|-------|-----------|---------|--------|---------|
| 1     | 6.764     | 2609470 | 127312 | 51.421  |
| 2     | 8.087     | 2465210 | 100355 | 48.579  |
| Total |           | 5074679 | 227667 | 100.000 |

F:\project2\15-05-09.....014.lcd

# HPLC-REPORT OF CHIRAL 8b

Acquired by : Admin  
Sample Name : scs-307-chiral  
Sample ID : scs-307-chiral  
Vial # : 25  
Injection Volume : 20 uL  
Data File Name : 15-05-09.....015.lcd  
Method File Name : gen.lcm  
Batch File Name : 15-05-09.....lcb  
Report File Name : NPL HPLC REPORT new.lcr  
Data Acquired : 5/16/2009 2:17:06 AM  
Data Processed : 6/11/2009 5:06:29 PM  
Mobile phase: 10% Ipa in Hexane Column: Eurocel 01:250X4.6mm, 5u Flowrate: 1.0ml/min Detection: 225nm

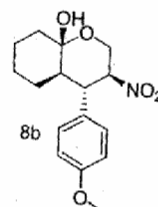

## <Chromatogram>

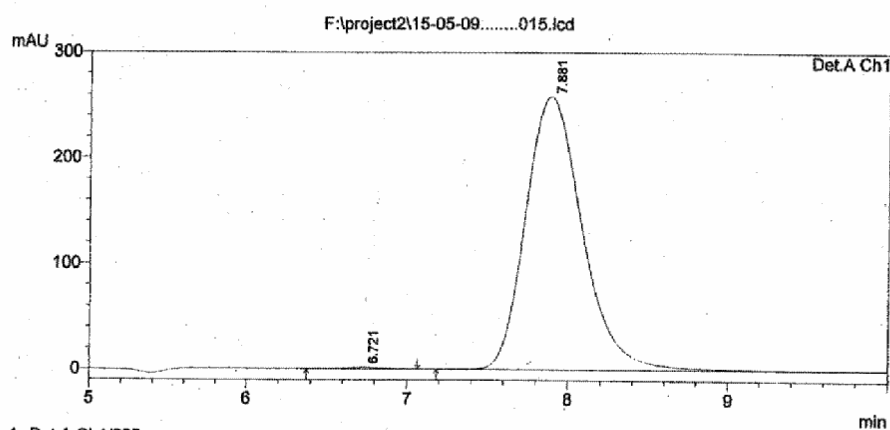

1 Det.A Ch1/225nm

PeakTable

| Peak# | Ret. Time | Area    | Height | Area %  |
|-------|-----------|---------|--------|---------|
| 1     | 6.721     | 20549   | 1265   | 0.324   |
| 2     | 7.881     | 6318922 | 258136 | 99.676  |
| Total |           | 6339472 | 259401 | 100.000 |

F:\project2\15-05-09.....015.lcd

## HPLC-REPORT OF RACEMIC 8c

Acquired by : Admin  
 Sample Name : scs-356-racemic  
 Sample ID : scs-356-racemic  
 Vial # : 20  
 Injection Volume : 20 uL  
 Data File Name : 15-05-09.....010.lcd  
 Method File Name : gen.lcm  
 Batch File Name : 15-05-09.....lcb  
 Report File Name : NPL HPLC REPORT new.lcr  
 Data Acquired : 5/15/2009 11:40:37 PM  
 Data Processed : 6/11/2009 4:31:07 PM  
 Mobile phase: 10% Ipa in Hexane Column: Eurocel 01:250X4.6mm, 5u Flowrate: 1.0ml/min Detection: 225nm

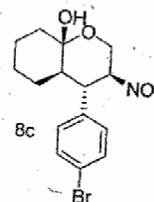

## &lt;Chromatogram&gt;

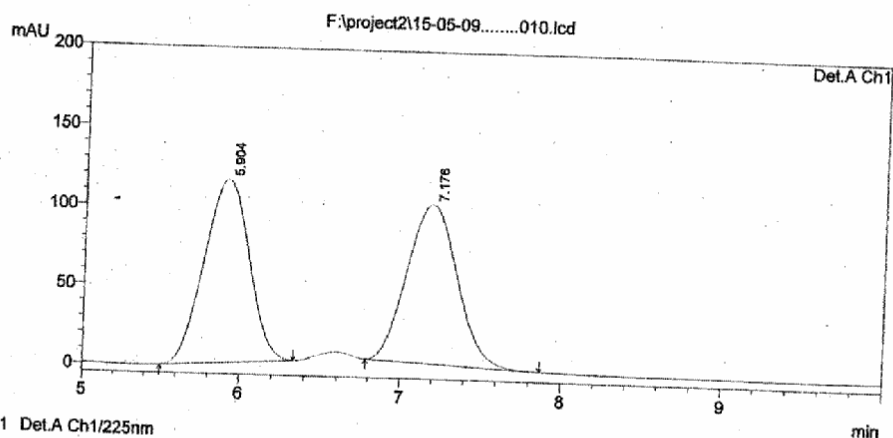

Detector A Ch1 225nm

| Peak# | Ret. Time | Area    | Height | Area %  |
|-------|-----------|---------|--------|---------|
| 1     | 5.904     | 2237531 | 114910 | 50.537  |
| 2     | 7.176     | 2189959 | 100047 | 49.463  |
| Total |           | 4427490 | 214957 | 100.000 |

PeakTable

F:\project2\15-05-09.....010.lcd

## HPLC-REPORT OF CHIRAL 8c

Acquired by : Admin  
 Sample Name : scs-356-chiral  
 Sample ID : scs-356-chiral  
 Vial # : 21  
 Injection Volume : 20 uL  
 Data File Name : 15-05-09.....011.lcd  
 Method File Name : gen.lcm  
 Batch File Name : 15-05-09.....lcb  
 Report File Name : NPL HPLC REPORT new.lcr  
 Data Acquired : 5/16/2009 12:11:53 AM  
 Data Processed : 5/19/2009 4:23:04 PM  
 Mobile phase: 10% Ipa in Hexane Column: Eurocel 01:250X4.6mm, 5u Flowrate: 1.0ml/min Detection: 225nm

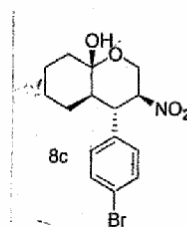

## &lt;Chromatogram&gt;

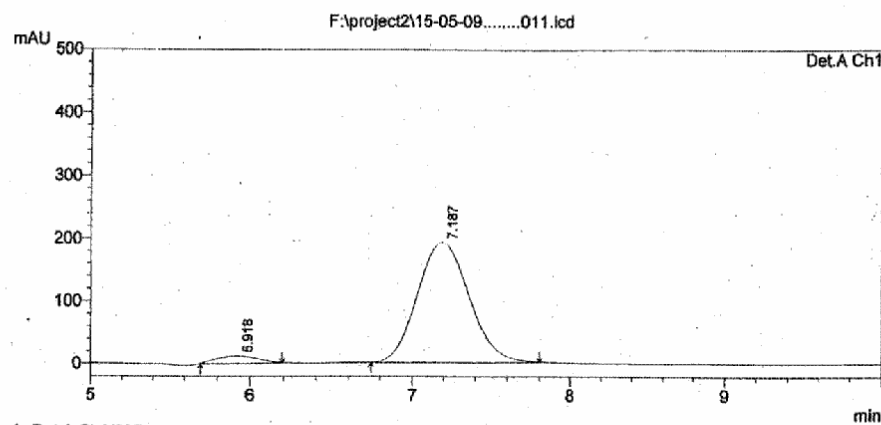

PeakTable

| Peak# | Ret. Time | Area    | Height | Area %  |
|-------|-----------|---------|--------|---------|
| 1     | 5.918     | 201918  | 11524  | 4.438   |
| 2     | 7.187     | 4348056 | 191693 | 95.562  |
| Total |           | 4549973 | 203217 | 100.000 |

F:\project2\15-05-09.....011.lcd



## HPLC-REPORT OF RACEMIC 8d

Acquired by : Admin  
Sample Name : scs-291-racemic  
Sample ID : scs-291-racemic  
Vial # : 22  
Injection Volume : 20 uL  
Data File Name : F:\project2\15-05-09.....012.lcd  
Method File Name : gen.lcm  
Batch File Name : 15-05-09.....lcb  
Report File Name : NPL HPLC REPORT new.lcr  
Data Acquired : 5/16/2009 12:43:11 AM  
Data Processed : 6/11/2009 4:52:39 PM  
Mobile phase: 10% Ipa in Hexane Column: Eurocel 01:250X4.6mm, 5u Flowrate: 1.0ml/min Detection: 225nm

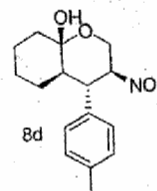

### <Chromatogram>

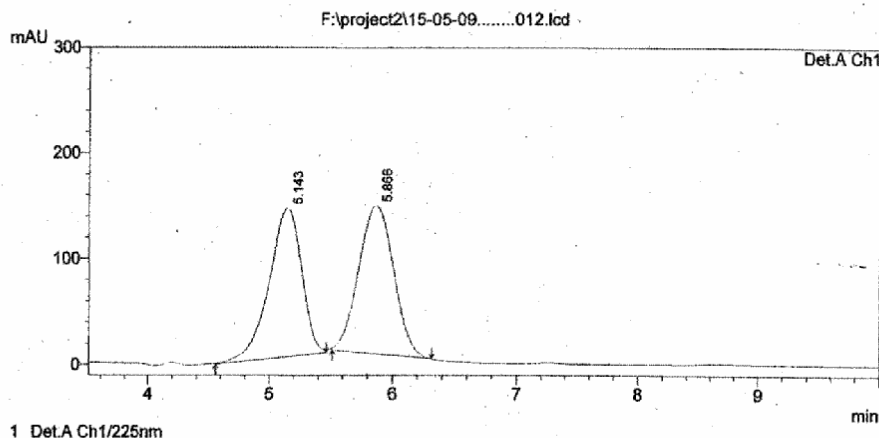

Detector A Ch1 225nm

PeakTable

| Peak# | Ret. Time | Area    | Height | Area %  |
|-------|-----------|---------|--------|---------|
| 1     | 5.143     | 2587864 | 140171 | 48.824  |
| 2     | 5.866     | 2712552 | 139805 | 51.176  |
| Total |           | 5300416 | 279976 | 100.000 |

F:\project2\15-05-09.....012.c

6/11/2009 12:07:32 1 / 1

# HPLC-REPORT OF CHIRAL 8d

Acquired by : Admin  
Sample Name : scs-291-chiral  
Sample ID : scs-291-chiral  
Vial # : 23  
Injection Volume : 20 uL  
Data File Name : 15-05-09.....013.lcd  
Method File Name : gen.lcm  
Batch File Name : 15-05-09.....lcb  
Report File Name : NPL HPLC REPORT new.lcr  
Data Acquired : 5/16/2009 1:14:28 AM  
Data Processed : 6/11/2009 4:56:14 PM  
Mobile phase: 10% Ipa in Hexane Column: Eurocel 01:250X4.6mm, 5u Flowrate: 1.0ml/min Detection: 225nm

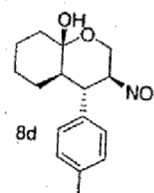

## <Chromatogram>

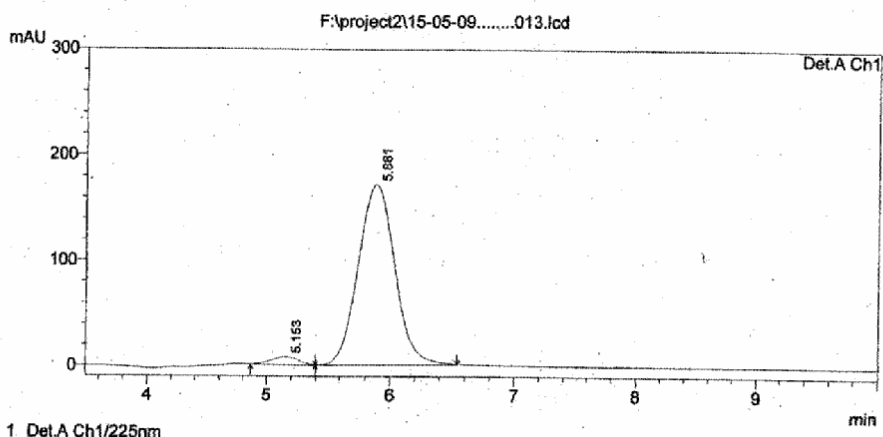

1. Det.A Ch1/225nm

PeakTable

| Peak# | Ret. Time | Area    | Height | Area %  |
|-------|-----------|---------|--------|---------|
| 1     | 5.153     | 112621  | 7204   | 3.145   |
| 2     | 5.881     | 3468249 | 171060 | 96.855  |
| Total |           | 3580870 | 178264 | 100.000 |

F:\project2\15-05-09.....013.lcd

6/13/2009 12:01:20 1 / 1

# HPLC-REPORT OF RACEMIC 8e

F:\project2\15-05-09.....002.lcd

Acquired by : Admin  
Sample Name : scs-302-racemic  
Sample ID : scs-302-racemic  
Vial # : 12  
Injection Volume : 20 uL  
Data File Name : 15-05-09.....002.lcd  
Method File Name : gen.lcm  
Batch File Name : 15-05-09.....lcb  
Report File Name : NPL HPLC REPORT new.lcr  
Data Acquired : 5/15/2009 7:30:14 PM  
Data Processed : 6/11/2009 5:10:31 PM  
Mobile phase: 10% IPA in Hexane  
Column: Eurocel01:250X4.6mm,5u  
Flowrate: 1.0ml/min  
Detection: 225nm

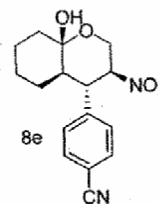

## <Chromatogram>

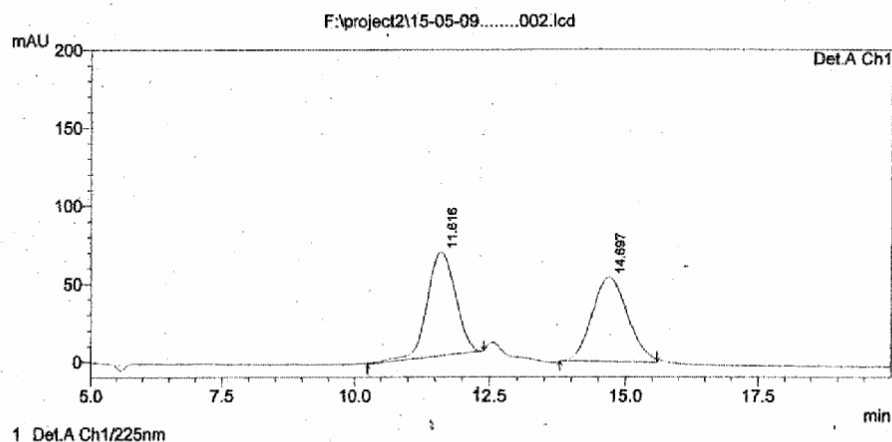

1 Det.A Ch1/225nm

PeakTable

Detector A Ch1 225nm

| Peak# | Ret. Time | Area    | Height | Area %  |
|-------|-----------|---------|--------|---------|
| 1     | 11.616    | 2430260 | 66295  | 49.607  |
| 2     | 14.697    | 2468772 | 53920  | 50.393  |
| Total |           | 4899032 | 120215 | 100.000 |

F:\project2\15-05-09.....002.lcd

6/13/2009 12:00:53 1 / 1

# HPLC-REPORT OF CHIRAL 8e

F:\project2\15-05-09.....003.lcd

Acquired by : Admin  
Sample Name : scs-302-chiral  
Sample ID : scs-302-chiral  
Vial # : 13  
Injection Volume : 20 uL  
Data File Name : 15-05-09.....003.lcd  
Method File Name : gen.lcm  
Batch File Name : 15-05-09.....lcb  
Report File Name : NPL HPLC REPORT new.lcr  
Data Acquired : 5/15/2009 8:01:33 PM  
Data Processed : 6/11/2009 5:13:44 PM  
Mobile phase: 10% Ipa in Hexane  
Column: Eurocel01:250X4.6mm,5u  
Flowrate: 1.0ml/min  
Detection: 225nm

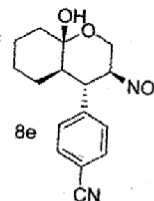

## <Chromatogram>

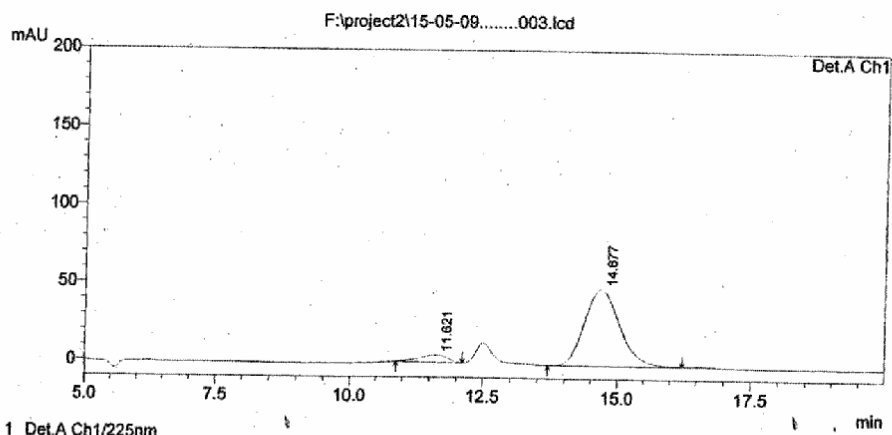

Detector A Ch1 225nm

PeakTable

| Peak# | Ret. Time | Area    | Height | Area %  |
|-------|-----------|---------|--------|---------|
| 1     | 11.621    | 166144  | 4487   | 6.775   |
| 2     | 14.677    | 2286166 | 49221  | 93.225  |
| Total |           | 2452310 | 53709  | 100.000 |

F:\project2\15-05-09.....003.lcd

6/13/2009 12:06:59 1 / 1

## HPLC-REPORT OF RACEMIC 8f

Acquired by : Admin  
Sample Name : scs-295-racemic  
Sample ID : scs-295-racemic  
Vial # : 10  
Injection Volume : 20 uL  
Data File Name : 18-05-09.....lcd  
Method File Name : gen.lcm  
Batch File Name : 15-05-09.....lcb  
Report File Name : NPL HPLC REPORT new.lcr  
Data Acquired : 5/18/2009 6:40:32 PM  
Data Processed : 6/11/2009 5:31:02 PM  
Mobile phase: 5% Ipa in Hexane Column: Eurocel01: 250X4.6mm, 5u Flowrate: 1.0ml/min Detection: 225nm

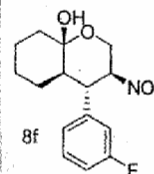

### <Chromatogram>

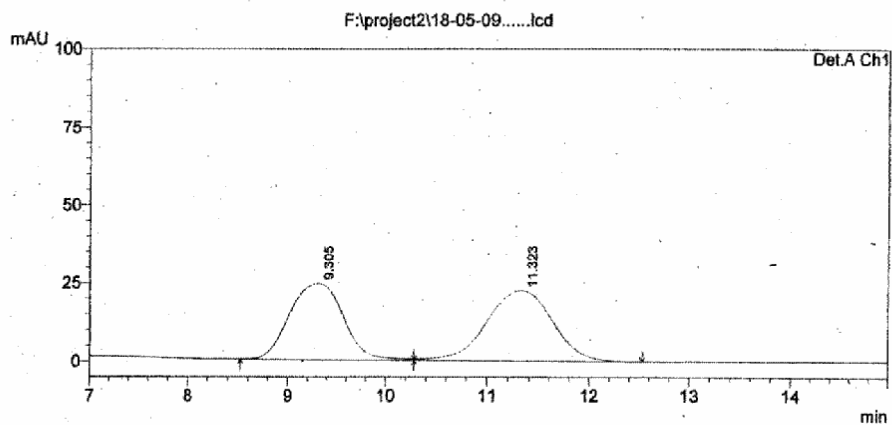

1 Det.A Ch1/225nm

PeakTable

Detector A Ch1 225nm

| Peak# | Ret. Time | Area    | Height | Area %  |
|-------|-----------|---------|--------|---------|
| 1     | 9.305     | 921089  | 24327  | 48.132  |
| 2     | 11.323    | 992598  | 22365  | 51.868  |
| Total |           | 1913687 | 46691  | 100.000 |

F:\project2\18-05-09.....lcd

6/13/2009 12:06:36 1 / 1

# HPLC-REPORT OF CHIRAL 8f

F:\project2\18-05-09.....001.lcd

Acquired by : Admin  
Sample Name : scs-295-chiral  
Sample ID : scs-295-chiral  
Vial # : 11  
Injection Volume : 20 uL  
Data File Name : 18-05-09.....001.lcd  
Method File Name : gen.lcm  
Batch File Name : 15-05-09.....lcb  
Report File Name : NPL HPLC REPORT new.lcr  
Data Acquired : 5/18/2009 7:11:47 PM  
Data Processed : 6/11/2009 5:35:58 PM  
Mobile phase: 5% Ipa in Hexane  
Column: Eurocel01:250X4.6mm, 5u  
Flowrate: 1.0ml/min  
Detection: 225nm

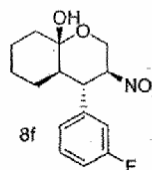

## <Chromatogram>

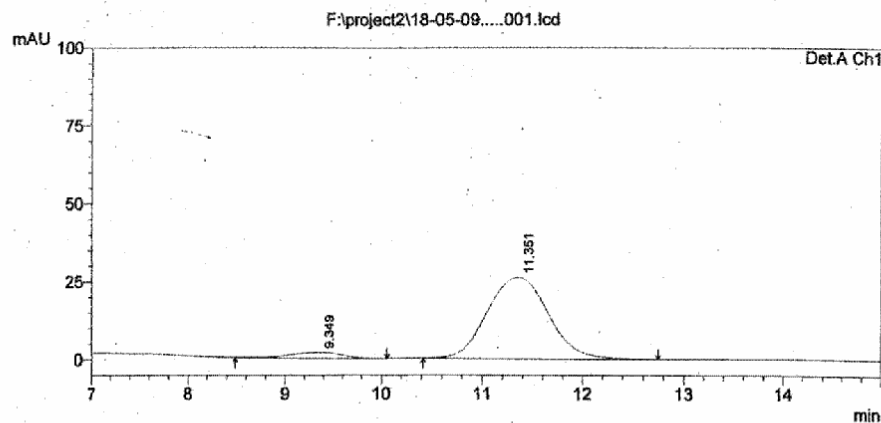

1 Det.A Ch1/225nm

PeakTable

| Peak# | Ret. Time | Area    | Height | Area %  |
|-------|-----------|---------|--------|---------|
| 1     | 9.349     | 64583   | 1793   | 5.583   |
| 2     | 11.351    | 1092119 | 25991  | 94.417  |
| Total |           | 1156701 | 27784  | 100.000 |

F:\projec.2\18-05-09.....001.lcd

C 13/2009 11:59:06 1 1

## HPLC-REPORT OF RACEMIC 8g

Acquired by : Admin  
Sample Name : scs-322-racemic  
Sample ID : scs-322-racemic  
Vial # : 16  
Injection Volume : 20 uL  
Data File Name : 15-05-09.....006.lcd  
Method File Name : gen.lcm  
Batch File Name : 15-05-09.....lcb  
Report File Name : NPL HPLC REPORT new.lcr  
Data Acquired : 5/15/2009 9:35:25 PM  
Data Processed : 6/11/2009 5:21:44 PM  
Mobile phase: 10% Ipa in Hexane  
Column: Eurocel01:250X4.6mm, 5u  
Flowrate: 1.0ml/min  
Detection: 225nm

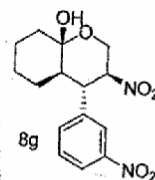

### <Chromatogram>

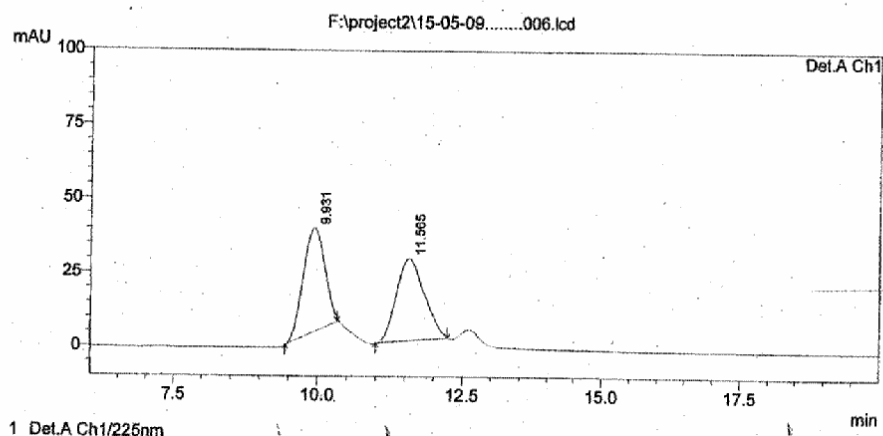

Detector A Ch1 225nm

PeakTable

| Peak# | Ret. Time | Area    | Height | Area %  |
|-------|-----------|---------|--------|---------|
| 1     | 9.931     | 901200  | 35025  | 49.107  |
| 2     | 11.565    | 933960  | 27765  | 50.893  |
| Total |           | 1835160 | 62791  | 100.000 |

F:\project2\15-05-09.....006.lcd

Enantiopure cycloalkane fused tetrahydro pyrans through domino Michael-ketalizations with organocatalysis

Srivari Chandrasekhar, Kundarapu Mallikarjun, Gangireddy Pavankumarreddy, Veera Mohan and Bharatam Jagadeesh

6/13/2009 11:59:53 1 / 1

## HPLC-REPORT OF CHIRAL 8g

Acquired by : Admin  
Sample Name : scs-322-chiral  
Sample ID : scs-322-chiral  
Vial # : 17  
Injection Volume : 20 uL  
Data File Name : 15-05-09.....007.lcd  
Method File Name : gen.lcm  
Batch File Name : 15-05-09.....lcb  
Report File Name : NPL HPLC REPORT new.lcr  
Data Acquired : 5/15/2009 10:06:44 PM  
Data Processed : 6/11/2009 6:04:50 PM  
Mobile phase: 10% Ipa in Hexane Column: Eurocel 01:250X4.6mm, 5u Flowrate: 1.0ml/min Detection: 225nm

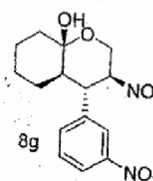

### <Chromatogram>

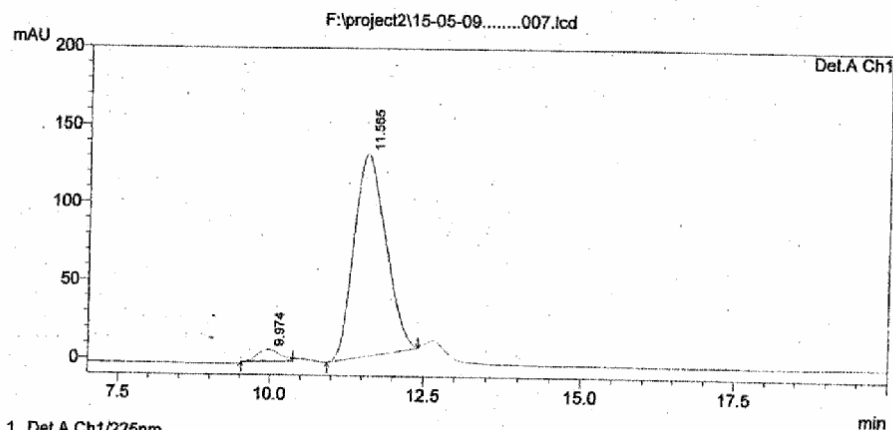

1 Det.A Ch1/225nm

PeakTable

| Peak# | Ret. Time | Area    | Height | Area %  |
|-------|-----------|---------|--------|---------|
| 1     | 9.974     | 189970  | 7405   | 3.913   |
| 2     | 11.565    | 4664601 | 129715 | 96.087  |
| Total |           | 4854571 | 137120 | 100.000 |

F:\project2\15-05-09.....007.lcd



# HPLC-REPORT OF RACEMIC 8h

Acquired by : Admin  
Sample Name : ses-267-racemic  
Sample ID : ses-267-racemic  
Vial # : 14  
Injection Volume : 20 uL  
Data File Name : 18-05-09.....004.lcd  
Method File Name : gen.lcm  
Batch File Name : 15-05-09.....lcb  
Report File Name : NPL HPLC REPORT new.lcr  
Data Acquired : 5/18/2009 8:45:39 PM  
Data Processed : 6/12/2009 2:14:10 PM  
Mobile phase: 5% Ipa in Hexane  
Column: Eurocel01:250X4.6mm,5u  
Flowrate: 1.0ml/min  
Detection: 225nm

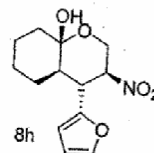

## <Chromatogram>

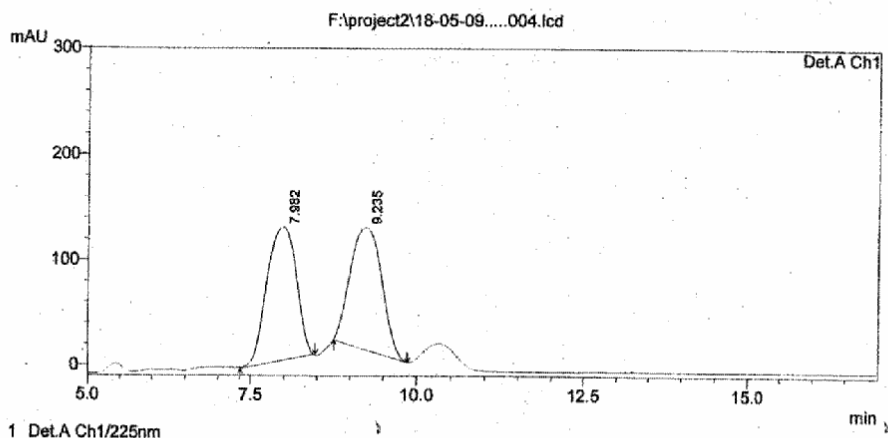

PeakTable

Detector A Ch1 225nm

| Peak# | Ret. Time | Area    | Height | Area %  |
|-------|-----------|---------|--------|---------|
| 1     | 7.982     | 3905788 | 126258 | 50.637  |
| 2     | 9.235     | 3807569 | 115994 | 49.363  |
| Total |           | 7713357 | 242252 | 100.000 |

F:\project2\18-05-09.....004.lcd

6/13/2009 12:02:53 1 / 1

# HPLC-REPORT OF CHIRAL 8h

Acquired by : Admin  
Sample Name : scs-267-chiral  
Sample ID : scs-267-chiral  
Vial # : 15  
Injection Volume : 20 uL  
Data File Name : 18-05-09.....005.lcd  
Method File Name : gen.lcm  
Batch File Name : 15-05-09.....lcb  
Report File Name : NPL HPLC REPORT new.lcr  
Data Acquired : 5/18/2009 9:16:53 PM  
Data Processed : 6/11/2009 3:15:01 PM  
Mobile phase: 5% Ipa in Hexane  
Column: Eurocel01:250X4.6mm,5u  
Flowrate: 1.0ml/min  
Detection: 225nm

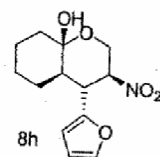

## <Chromatogram>

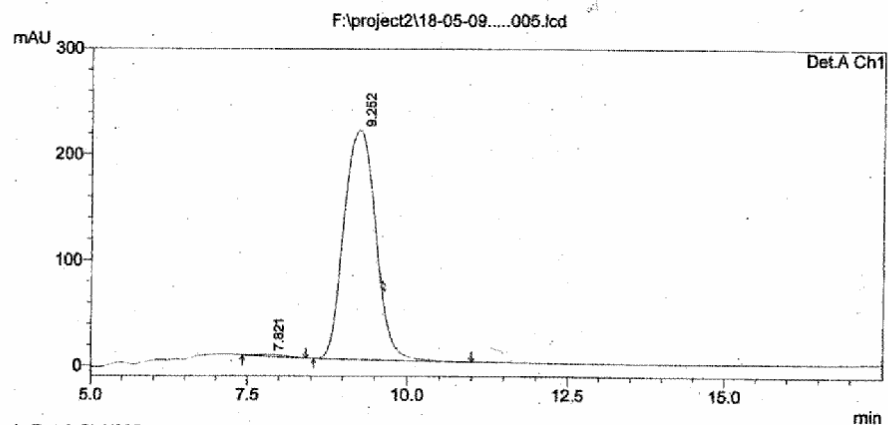

PeakTable

| Peak# | Ret. Time | Area    | Height | Area %  |
|-------|-----------|---------|--------|---------|
| 1     | 7.821     | 61387   | 1754   | 0.806   |
| 2     | 9.252     | 7551113 | 216863 | 99.194  |
| Total |           | 7612500 | 218617 | 100.000 |

F:\project2\18-05-09.....005.lcd
